# Supplementary material for: The effect of ionic versus covalent functionalization of polyoxometalate hybrid materials with coordinating subunits on their stability and interaction with DNA
Source: Royal Society of Chemistry journal article supplement (doi:10.1039/d4dt00965g), 2024-01-01
Supplement: d4dt00965g1.zip [file d4dt00965g1.zip]

## ***Electronic Supporting Information***

### **The effect of ionic versus covalent functionalization of Polyoxometalate hybrid materials with coordinating subunits on their stability and interaction with DNA**

Daria Nowicka<sup>#a</sup>, Dawid Marcinkowski<sup>#a</sup>, Nahir Vadra<sup>b</sup>, Martyna Szymańska<sup>a</sup>, Maciej Kubicki<sup>a</sup>, Giuseppe Consiglio<sup>c</sup>, Wojciech Drożdż<sup>ad</sup>, Artur R. Stefankiewicz<sup>ad</sup>, Violetta Patroniak<sup>a</sup>, Marta Fik-Jaskółka<sup>\*a</sup> and Adam Gorczyński<sup>\*a</sup>

<sup>a</sup> Adam Mickiewicz University in Poznań, Faculty of Chemistry, Uniwersytetu Poznańskiego 8, 61-614 Poznań, Poland

<sup>b</sup> Universidad de Buenos Aires, Facultad de Ciencias Exactas y Naturales, Departamento de Química Inorgánica, Analítica y Química Física and CONICET–Universidad de Buenos Aires, Instituto de Química Física de los Materiales, Medio Ambiente y Energía (INQUIMAE), Buenos Aires C1428EGA, Argentina

<sup>c</sup> Università di Catania, Dipartimento di Scienze Chimiche, I-95125 Catania, Italy

<sup>d</sup> Adam Mickiewicz University in Poznań, Center for Advanced Technology, Uniwersytetu Poznańskiego 10, 61-614 Poznań, Poland

\* Correspondence: marta.fik@amu.edu.pl; adam.gorczynski@amu.edu.pl

# equal contribution<sup>†</sup>

### ***Table of contents for Electronic Supporting Information***

|                                                                      |    |
|----------------------------------------------------------------------|----|
| 1. Schematic synthesis of ligand, complexes and hybrids.....         | 2  |
| 2. FT-IR spectra of ligand, complexes and hybrids .....              | 8  |
| 3. Comparison of FTIR spectra of compounds.....                      | 13 |
| 4. <sup>1</sup> H NMR spectra of ligand, complexes and hybrids ..... | 14 |
| 5. Comparison of <sup>1</sup> H NMR spectra of compounds .....       | 19 |
| 6. <sup>31</sup> P NMR spectra of hybrids.....                       | 28 |
| 7. Comparison of <sup>31</sup> P NMR spectra of hybrids .....        | 31 |
| 8. Biological measurements .....                                     | 32 |
| References.....                                                      | 35 |

## 1. Schematic synthesis of ligand, complexes and hybrids

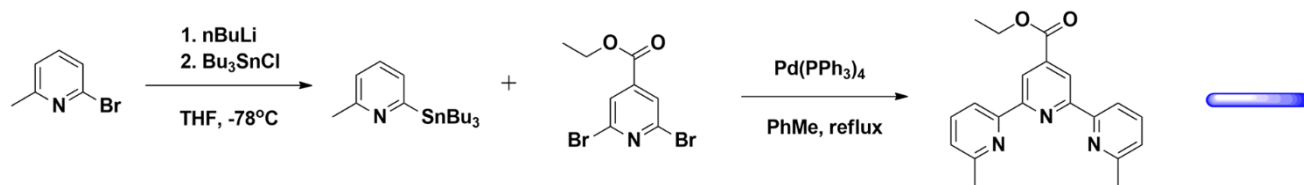

**Scheme S1.** Scheme of synthesis of ligand  $L^{tpy}$  [ $C_{20}H_{19}N_3O_2$ ] according to publication <sup>1</sup>.

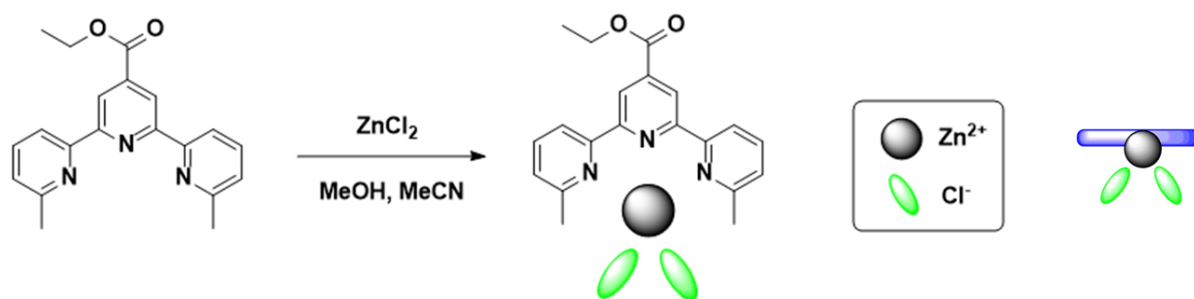

**Scheme S2.** Scheme of synthesis of complex **K1** [ $ZnL^{tpy}Cl_2$ ].

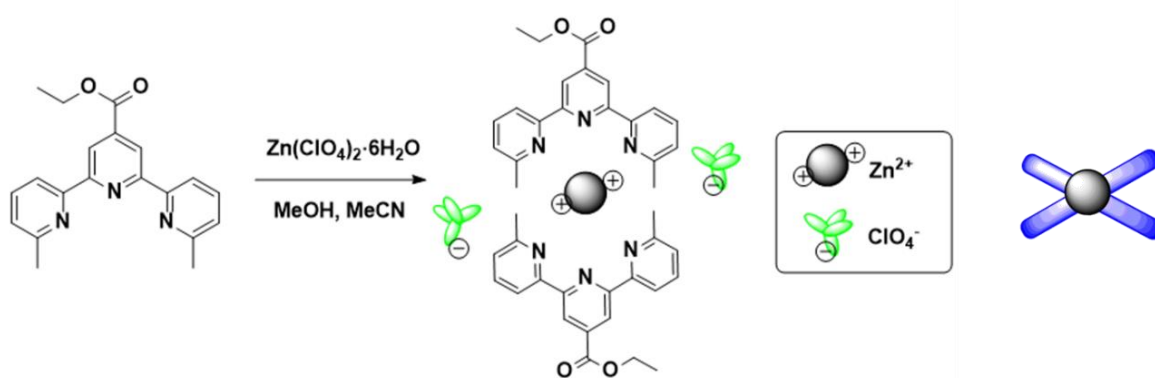

**Scheme S3.** Scheme of synthesis of complex **K2** [ $Zn(L^{tpy})_2(ClO_4)_2$ ].

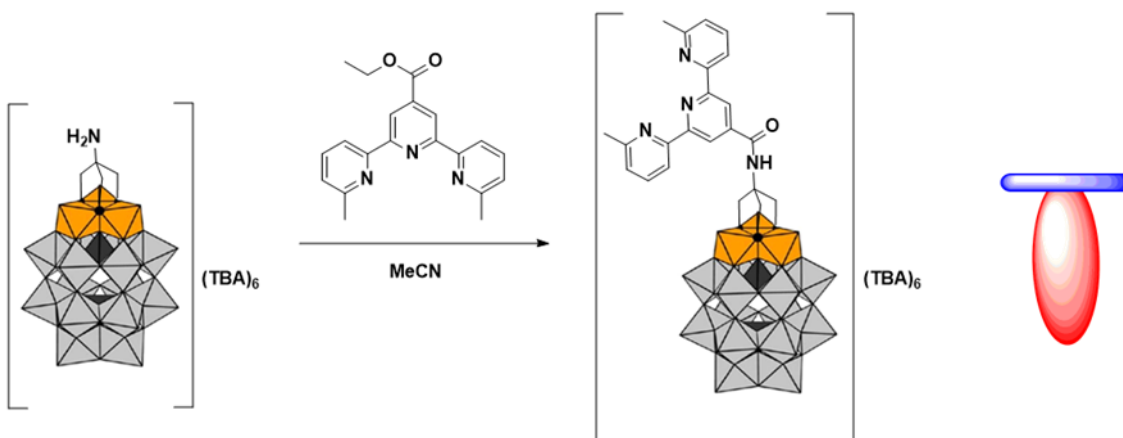

**Scheme S4.** Scheme of synthesis of hybrid **H1<sup>cov</sup>** (**POM** + **L<sup>tpy</sup>**).

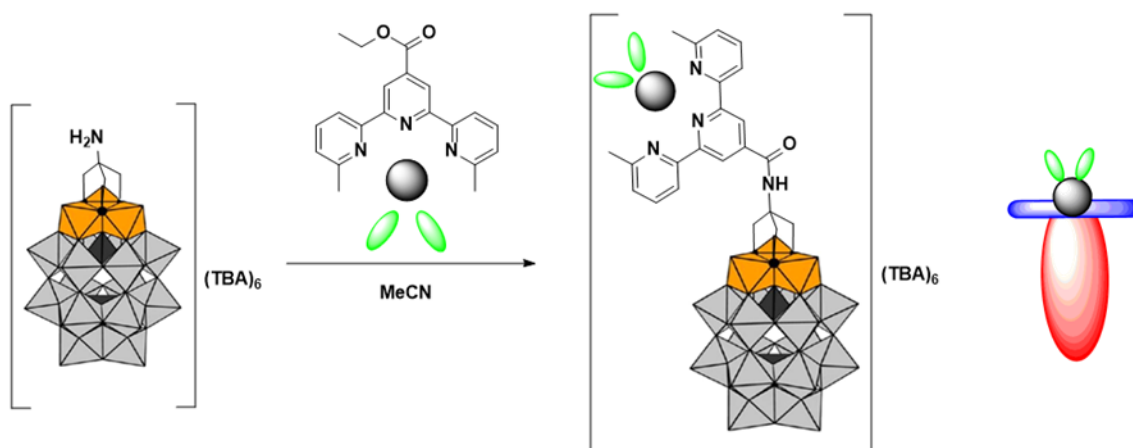

**Scheme S5.** Scheme of synthesis of hybrid **H2<sup>cov</sup>** (**POM** + **K1**).

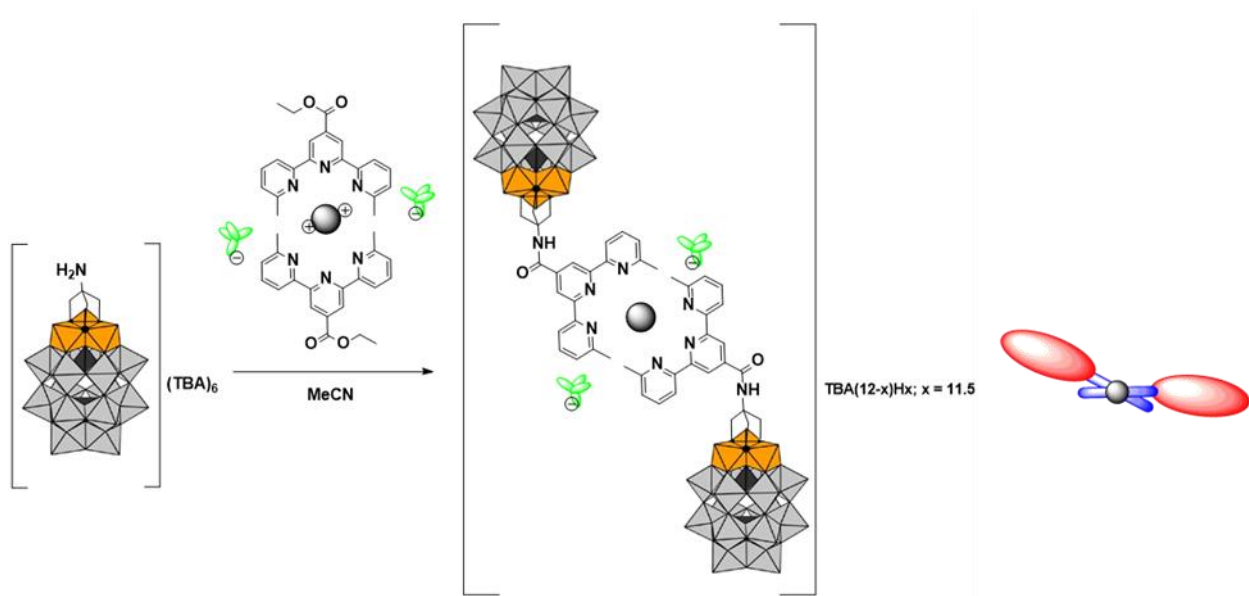

**Scheme S6.** Scheme of synthesis of hybrid  $\text{H3}^{\text{cov}}$  (POM + K2).

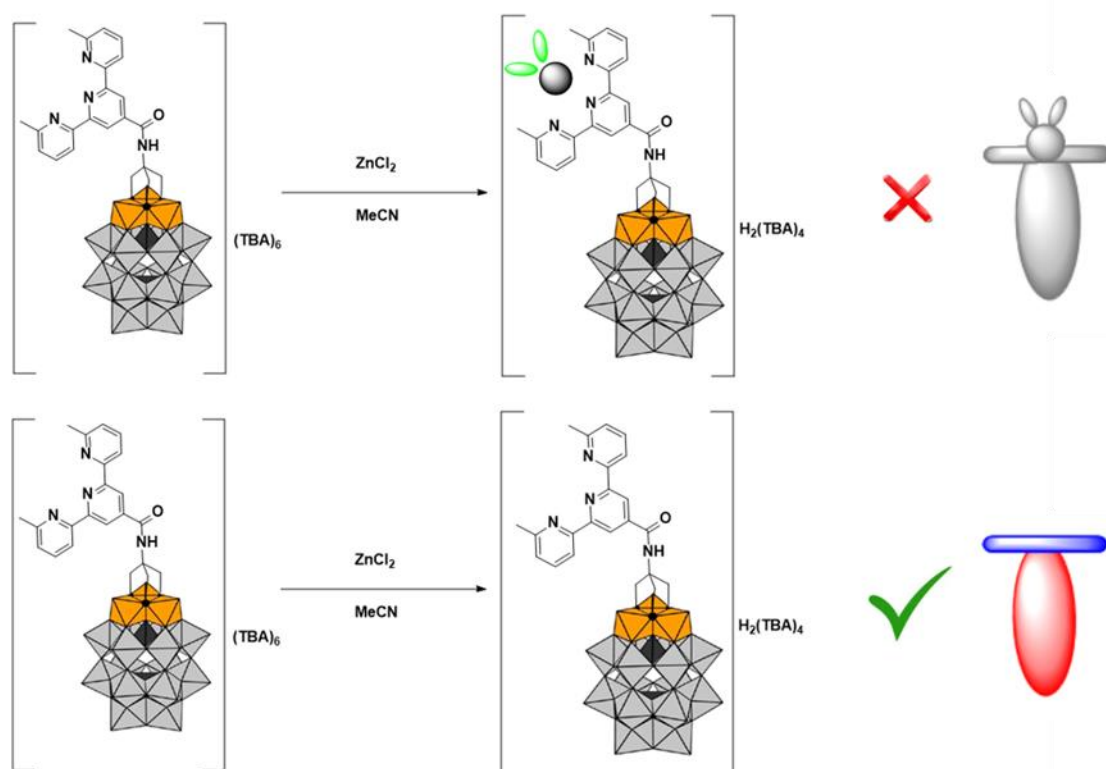

**Scheme S7.** Scheme of synthesis of hybrid  $\text{H4}^{\text{cov}}$  ( $\text{H1}^{\text{cov}}$  +  $\text{ZnCl}_2$ ).

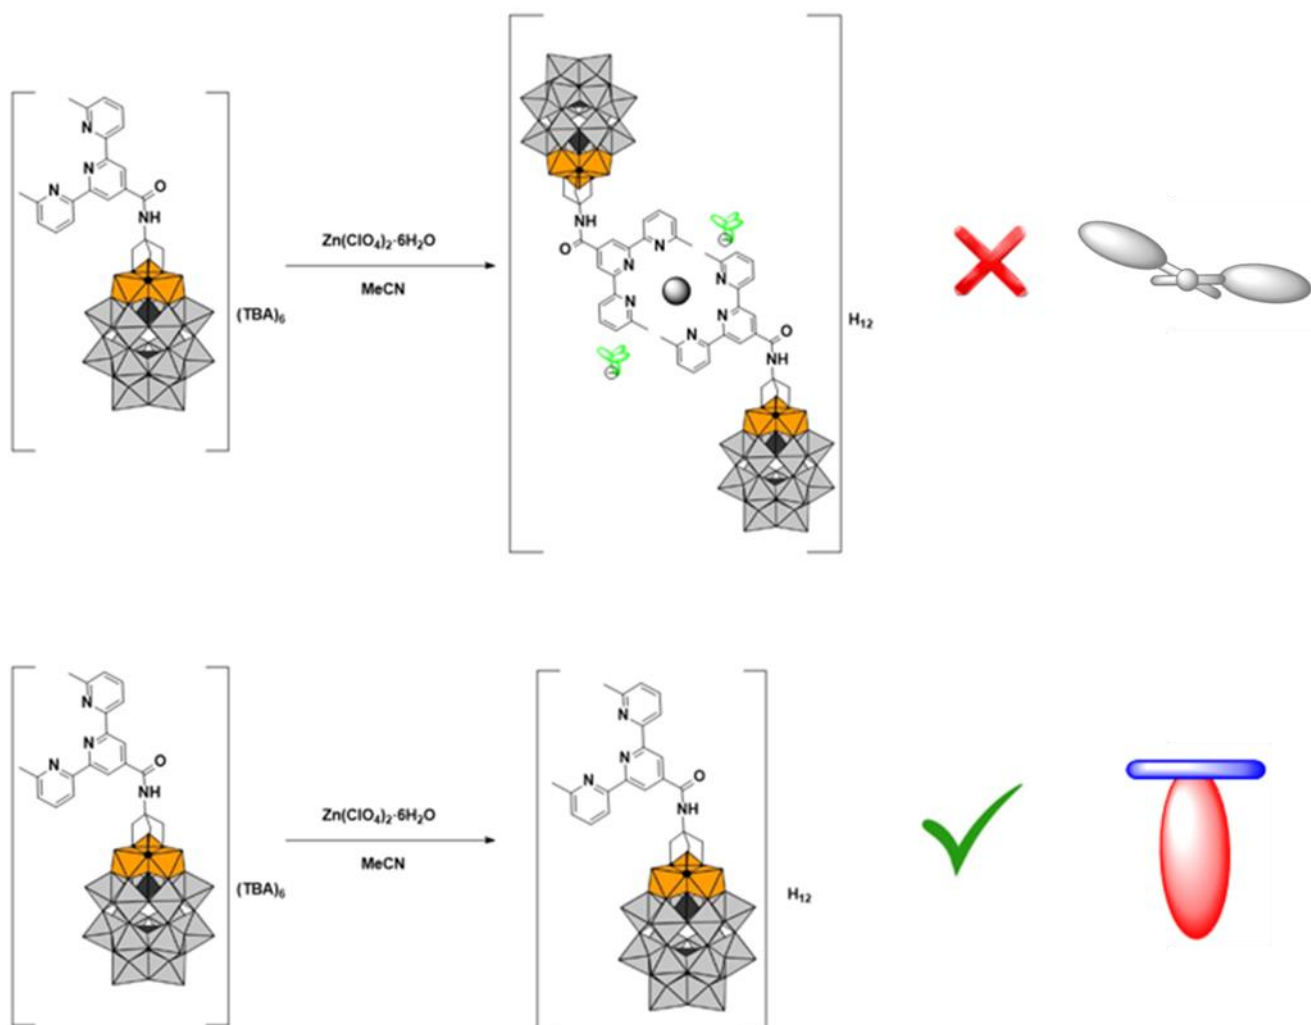

**Scheme S8.** Scheme of synthesis of hybrid **H5<sup>cov</sup>** (**H1<sup>cov</sup>** +  $\text{Zn}(\text{ClO}_4)_2$ ).

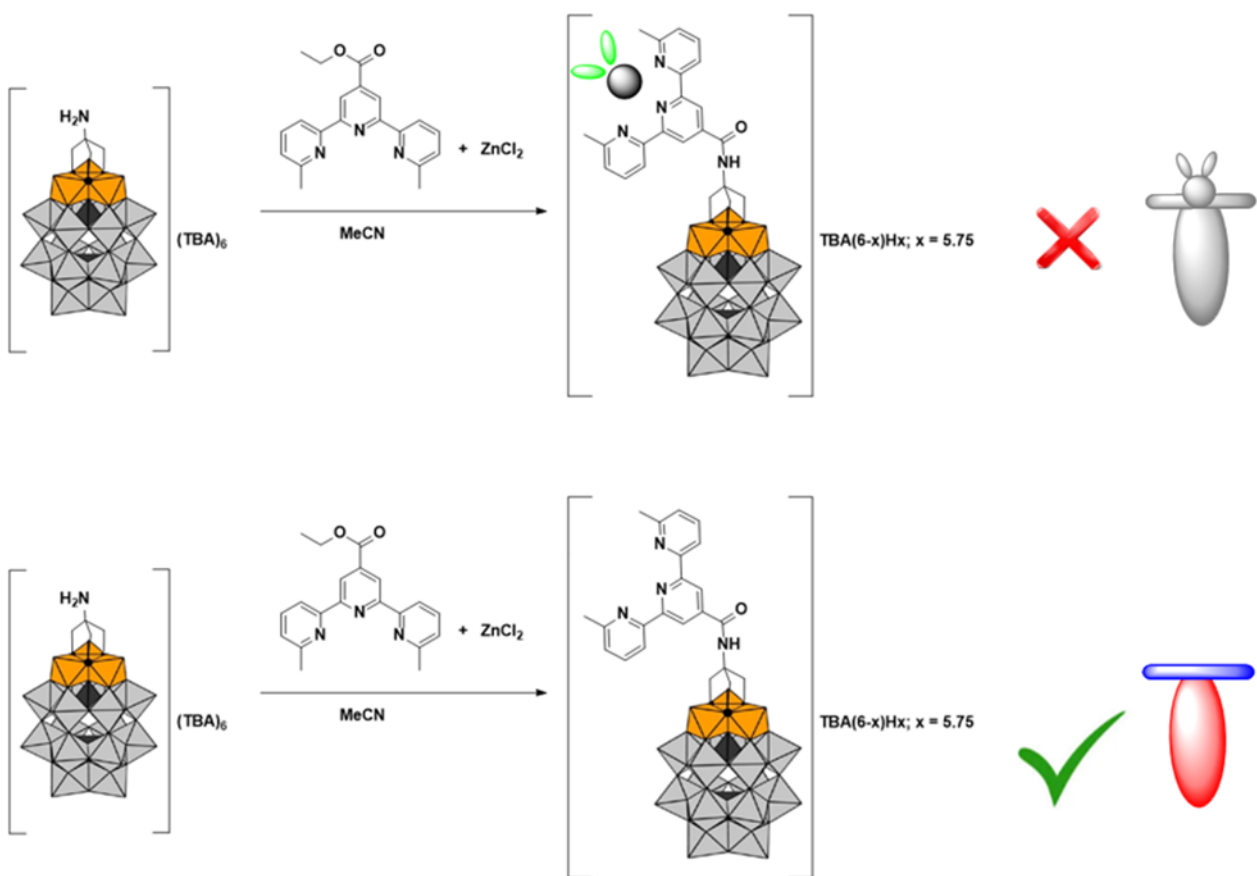

**Scheme S9.** Scheme of synthesis of hybrid **H6<sup>cov</sup>** (POM + L<sup>tpv</sup> + ZnCl<sub>2</sub>).

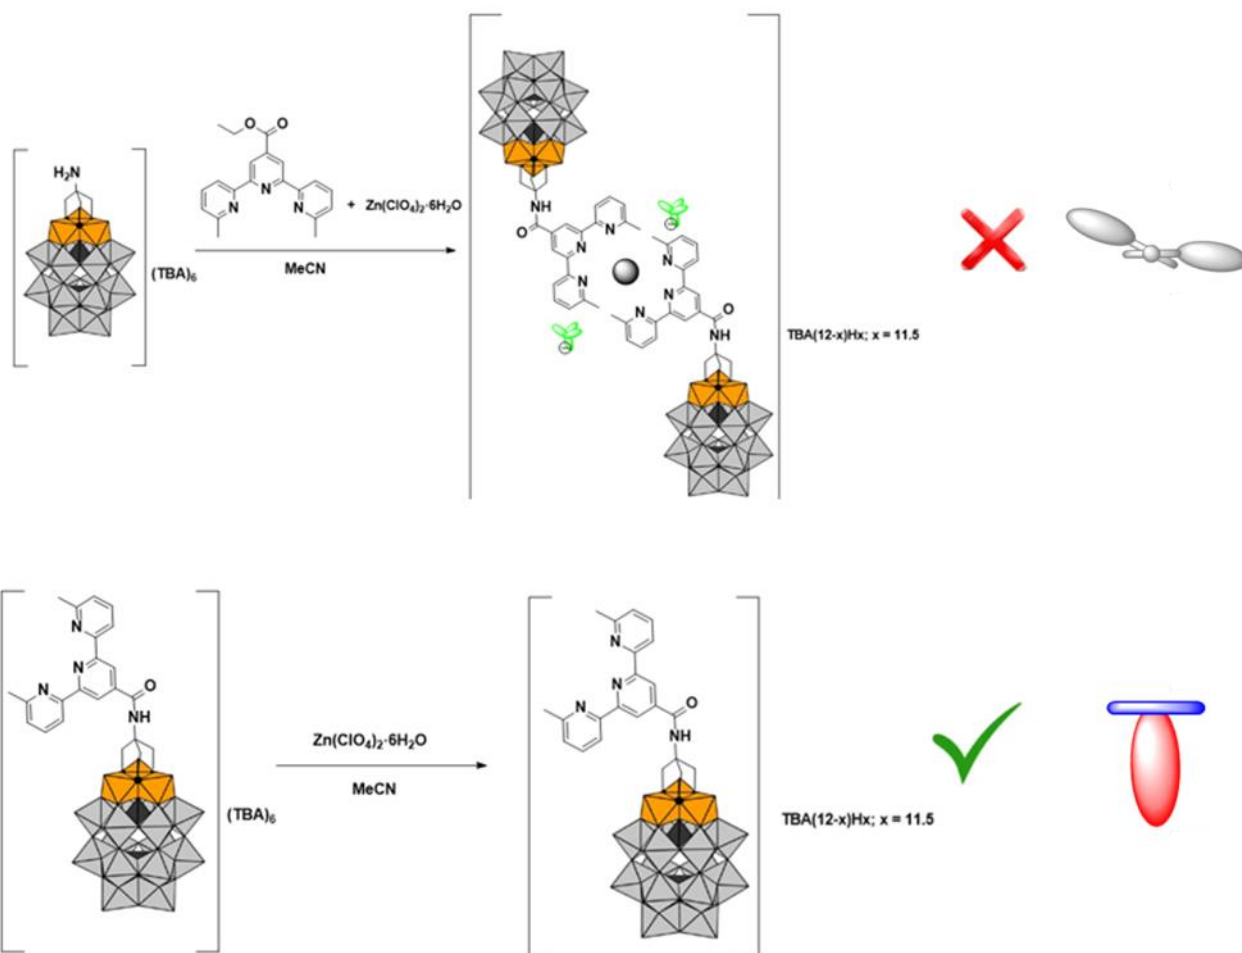

**Scheme S10.** Scheme of synthesis of hybrid **H7<sup>cov</sup>** (POM + **L<sup>tpy</sup>** +  $\text{Zn}(\text{ClO}_4)_2$ ).

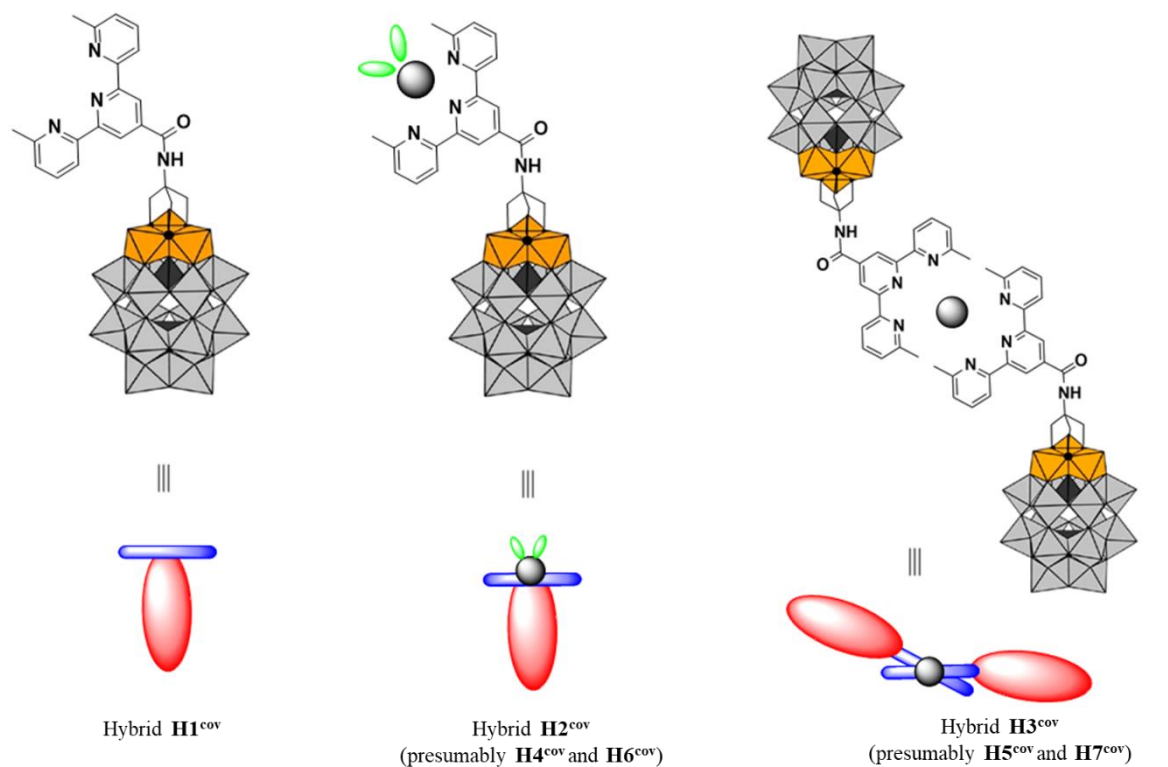

**Scheme S11.** Schematic representation structures of hybrids **H1<sup>cov</sup>** - **H7<sup>cov</sup>**.

## 2. FT-IR spectra of ligand, complexes and hybrids

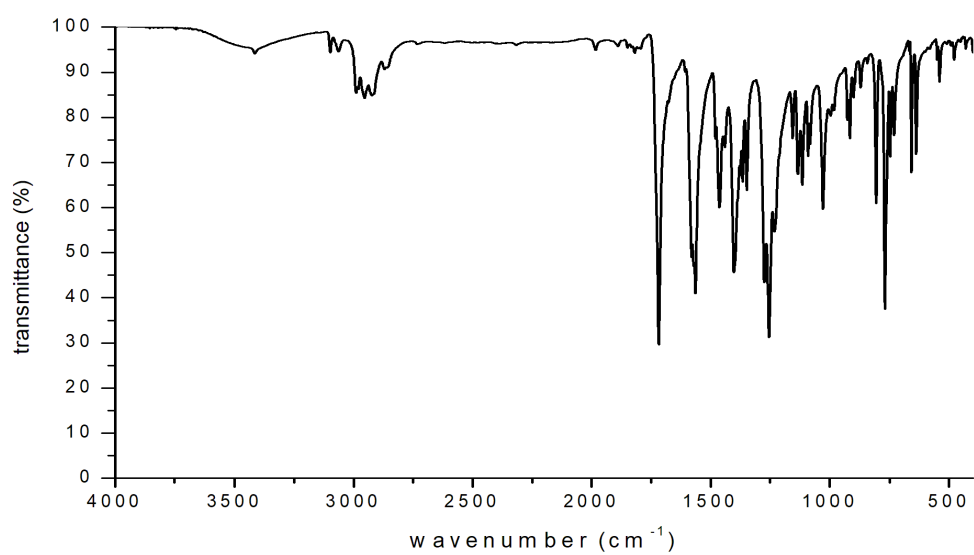

**Fig. S1.** IR spectrum of ligand **L<sup>tpy</sup>**.



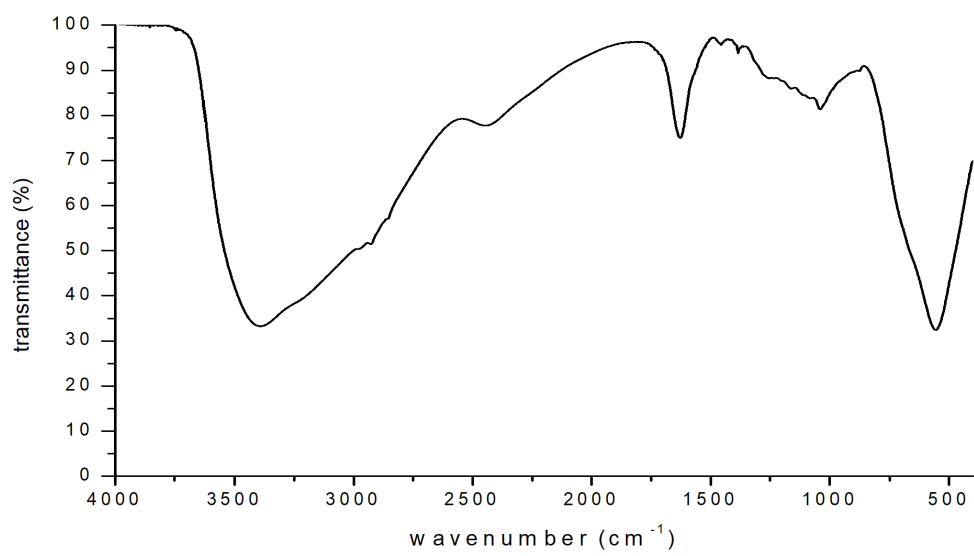

**Fig. S2.** IR spectrum of complex **K1**.

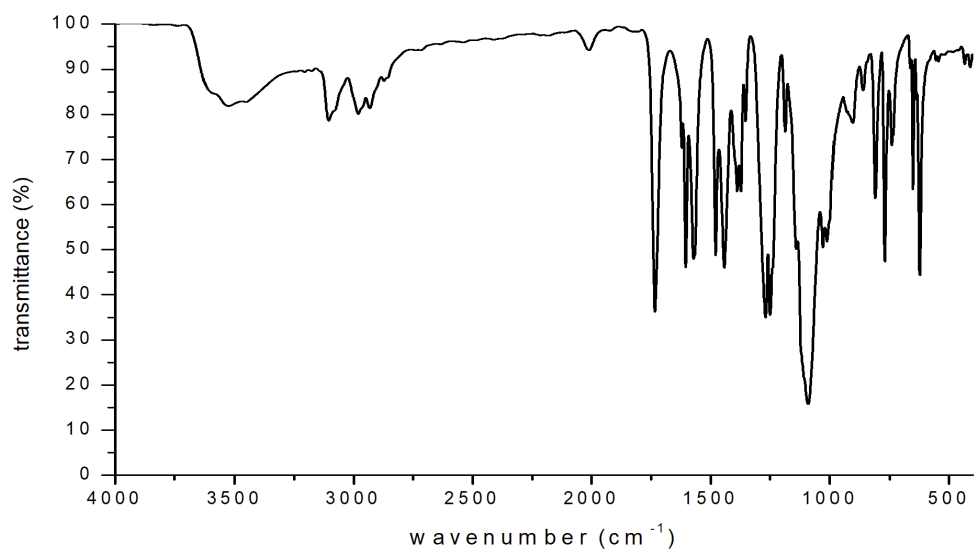

**Fig. S3.** IR spectrum of complex **K2**.

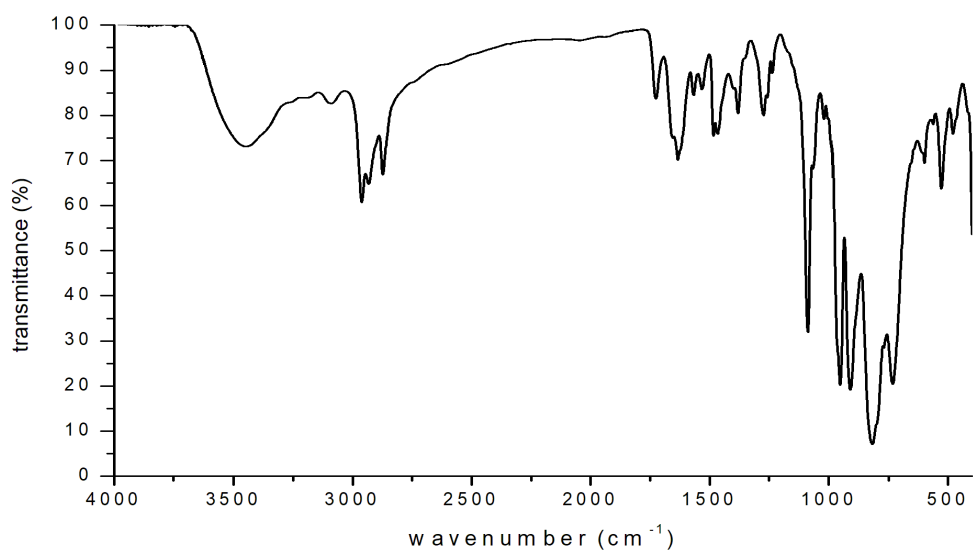

**Fig. S4.** IR spectrum of hybrid **H1<sup>cov</sup>** (**POM** + **L<sup>tpy</sup>**).

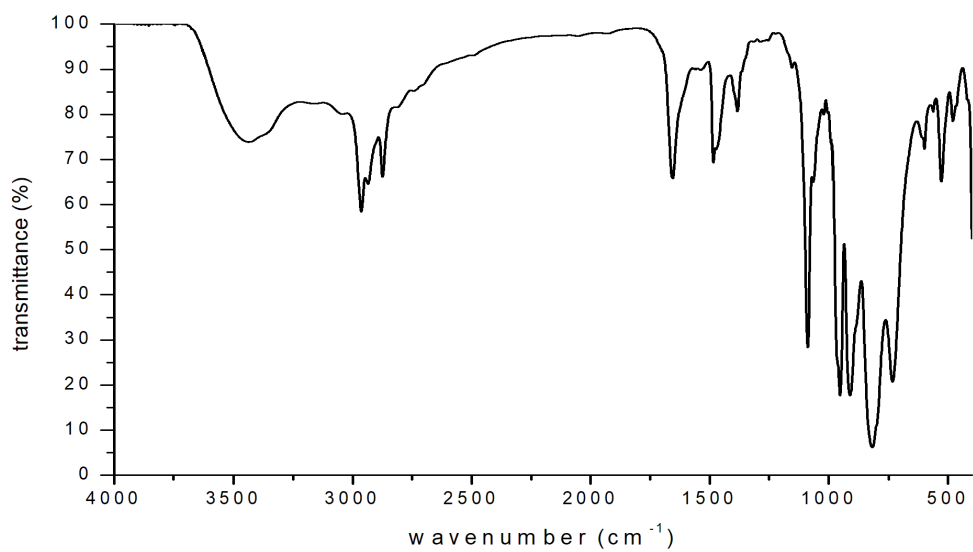

**Fig. S5.** IR spectrum of hybrid **H2<sup>cov</sup>** (**POM** + **K1**).

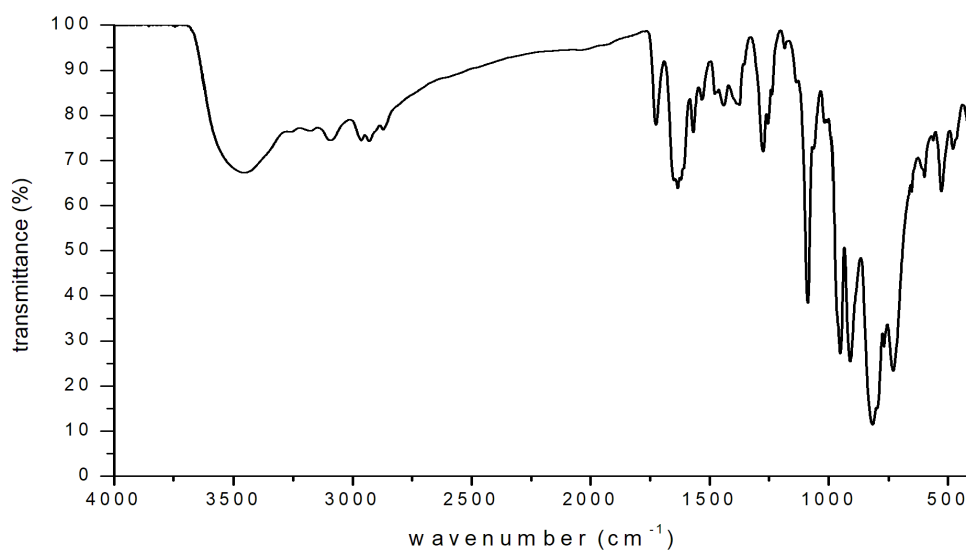

**Fig. S6.** IR spectrum of hybrid **H3<sup>cov</sup>** (**POM** + **K2**).

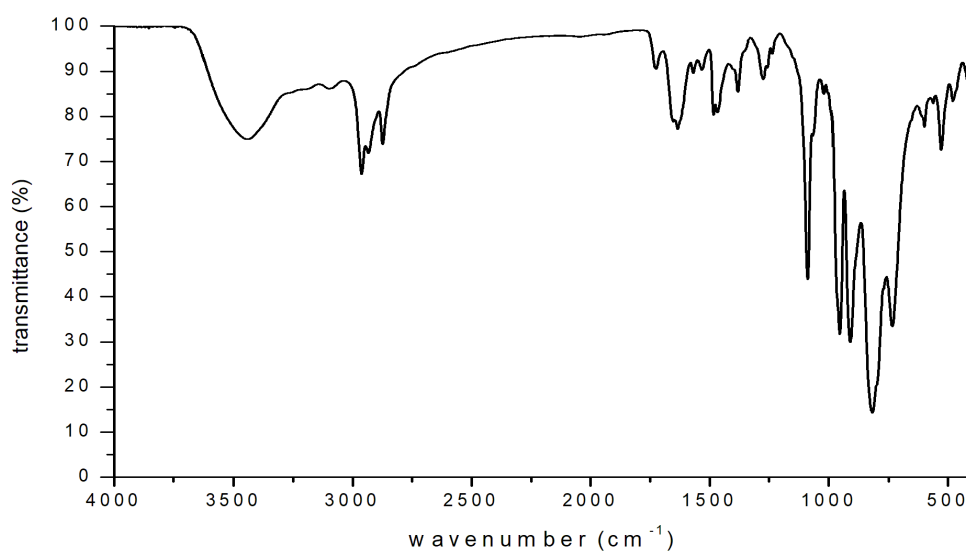

**Fig. S7.** IR spectrum of hybrid **H4<sup>cov</sup>** (**H1<sup>cov</sup>** + **ZnCl<sub>2</sub>**).

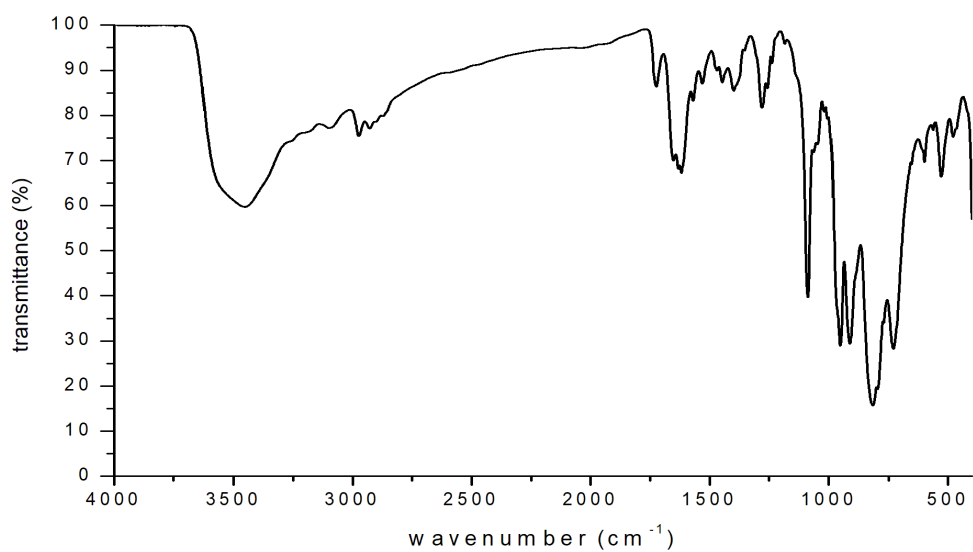

**Fig. S8.** IR spectrum of hybrid **H5<sup>cov</sup>** (**H1<sup>cov</sup>** + **Zn(ClO<sub>4</sub>)<sub>2</sub>**).

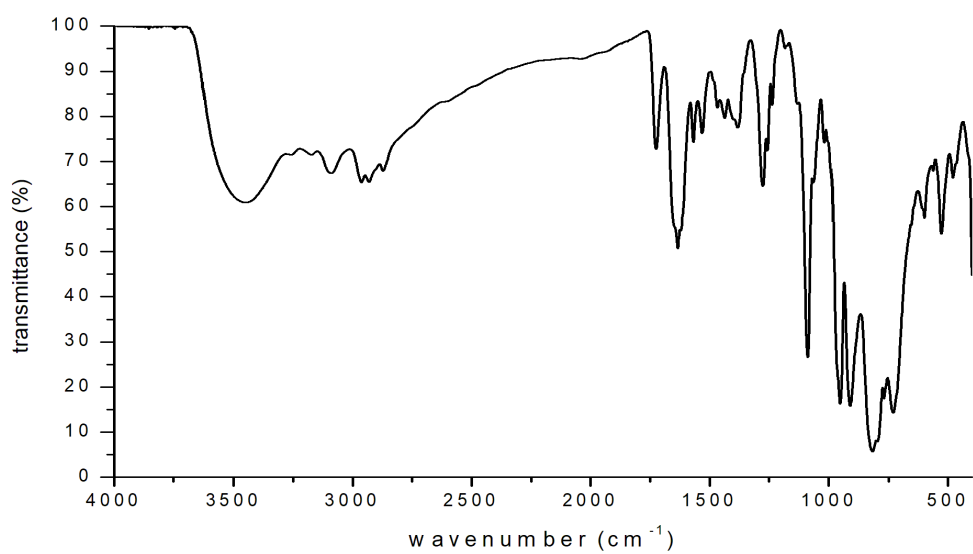

**Fig. S9.** IR spectrum of hybrid **H6<sup>cov</sup>** (**POM** + **L<sup>tpy</sup>** + **ZnCl<sub>2</sub>**).

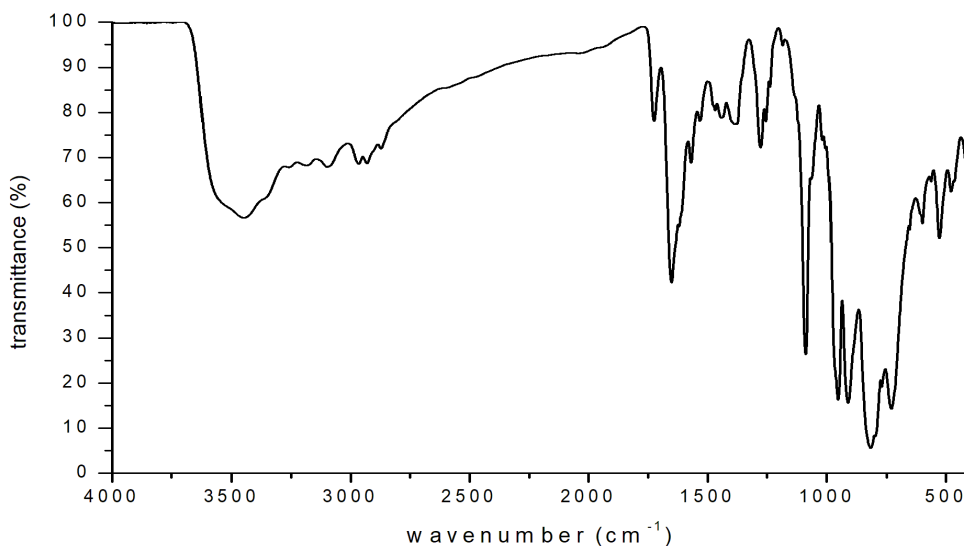

**Fig. S10.** IR spectrum of hybrid  $\text{H7}^{\text{cov}}$  ( $\text{POM} + \text{L}^{\text{tpy}} + \text{Zn}(\text{ClO}_4)_2$ ).

### 3. Comparison of IR spectra of compounds

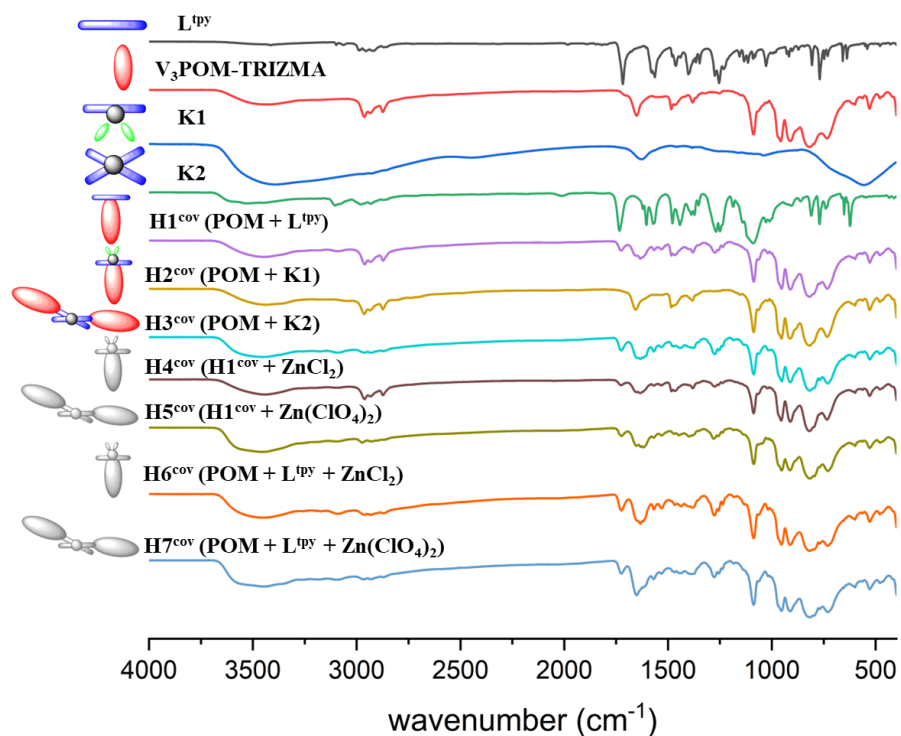

**Fig. S11.** Comparison of IR spectra of compounds:  $\text{L}^{\text{tpy}}$ ,  $\text{V}_3\text{POM-TRIZMA}$ ,  $\text{K1}$ ,  $\text{K2}$ ,  $\text{V}_3\text{POM-TBA}$ ,  $\text{H1}^{\text{cov}}$  ( $\text{POM} + \text{L}^{\text{tpy}}$ ),  $\text{H2}^{\text{cov}}$  ( $\text{POM} + \text{K1}$ ),  $\text{H3}^{\text{cov}}$  ( $\text{POM} + \text{K2}$ ),  $\text{H4}^{\text{cov}}$  ( $\text{H1}^{\text{cov}} + \text{ZnCl}_2$ ),  $\text{H5}^{\text{cov}}$  ( $\text{H1}^{\text{cov}} + \text{Zn}(\text{ClO}_4)_2$ ),  $\text{H6}^{\text{cov}}$  ( $\text{POM} + \text{L}^{\text{tpy}} + \text{ZnCl}_2$ ),  $\text{H7}^{\text{cov}}$  ( $\text{POM} + \text{L}^{\text{tpy}} + \text{Zn}(\text{ClO}_4)_2$ ), respectively.

#### 4. $^1\text{H}$ NMR spectra of ligand, complexes and hybrids

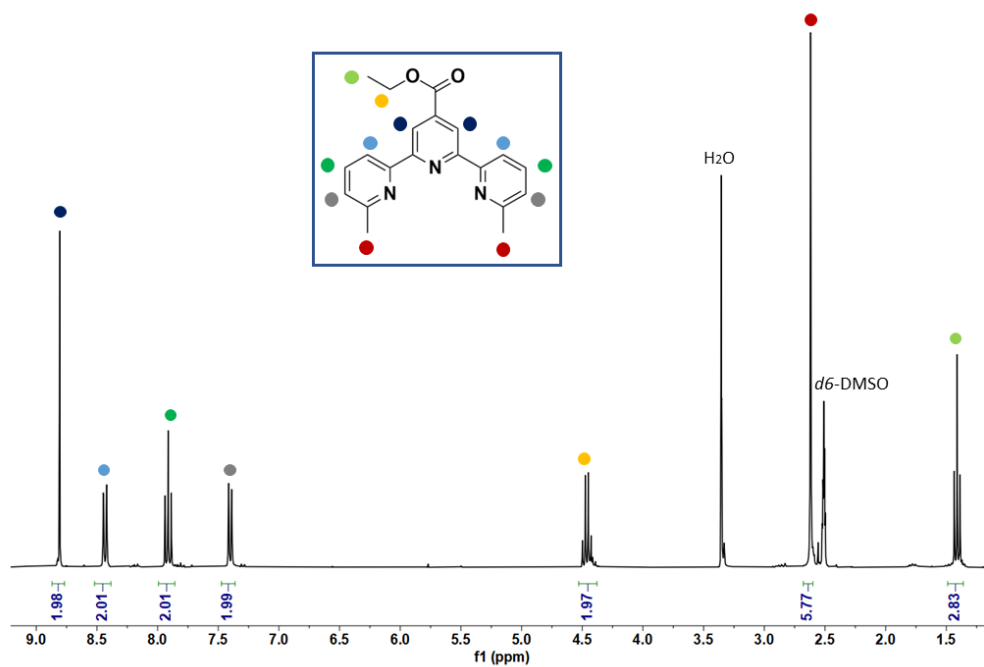

**Fig. S12.**  $^1\text{H}$  NMR spectrum of ligand  $\text{L}^{\text{tpy}}$  in  $\text{CDCl}_3$  at 400 MHz.

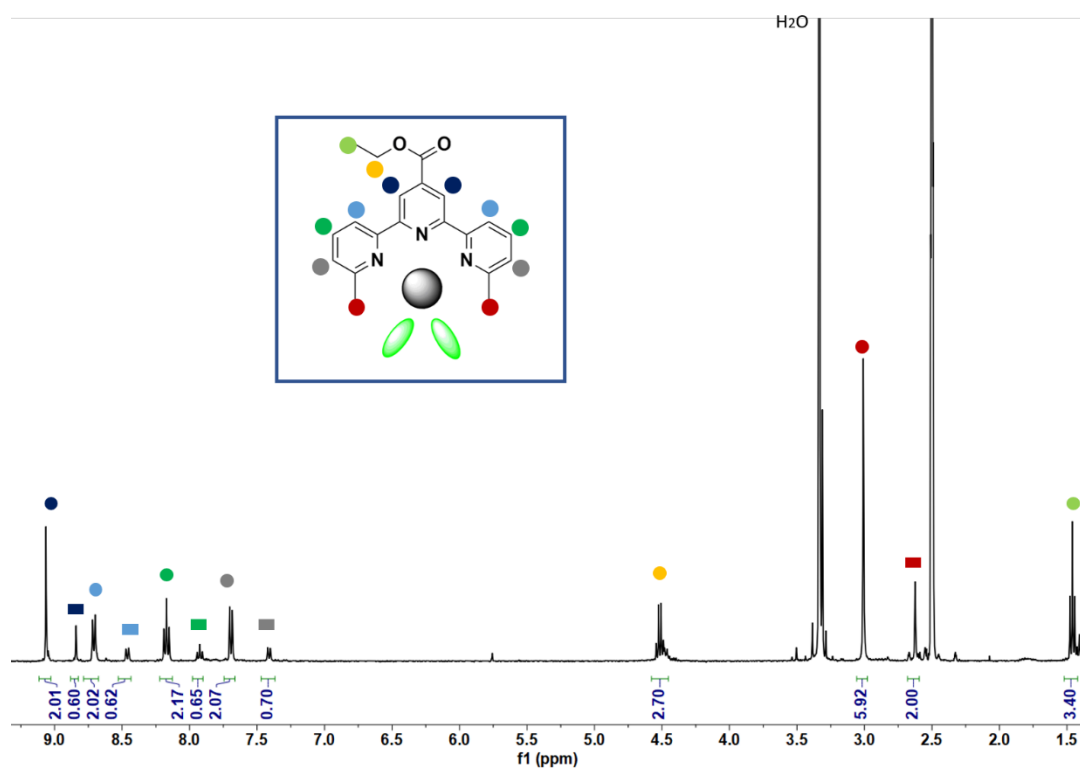

**Fig. S13.**  $^1\text{H}$  NMR spectrum of complex  $\text{K1}$  in  $d_6\text{-DMSO}$  at 400 MHz.

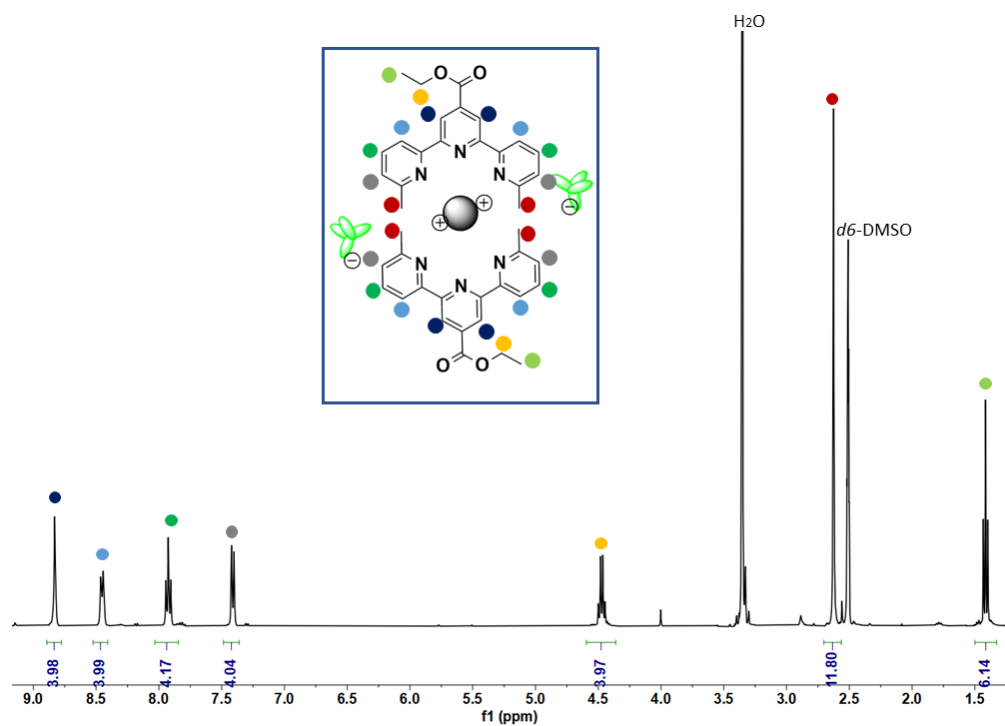

**Fig. S14.**  $^1\text{H}$  NMR spectrum of complex **K2** in  $d_6$ -DMSO at 400 MHz.

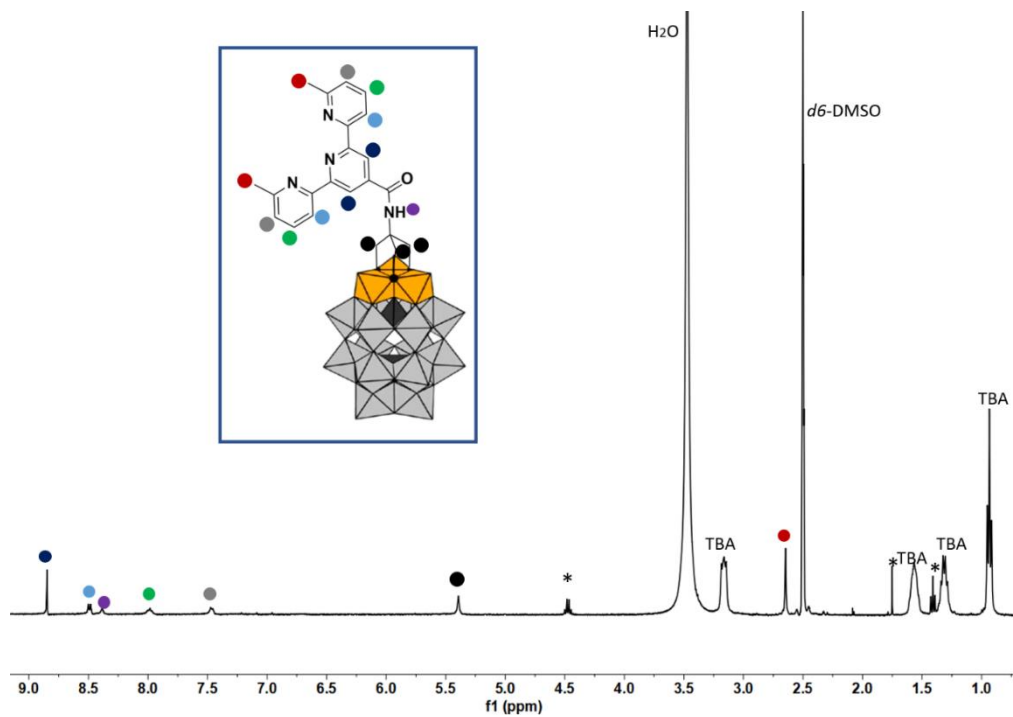

**Fig. S15.**  $^1\text{H}$  NMR spectrum of hybrid **H1<sup>cov</sup>** (**POM** + **L<sup>tpy</sup>**) in  $\text{DMSO-}d_6$  at 400 MHz.

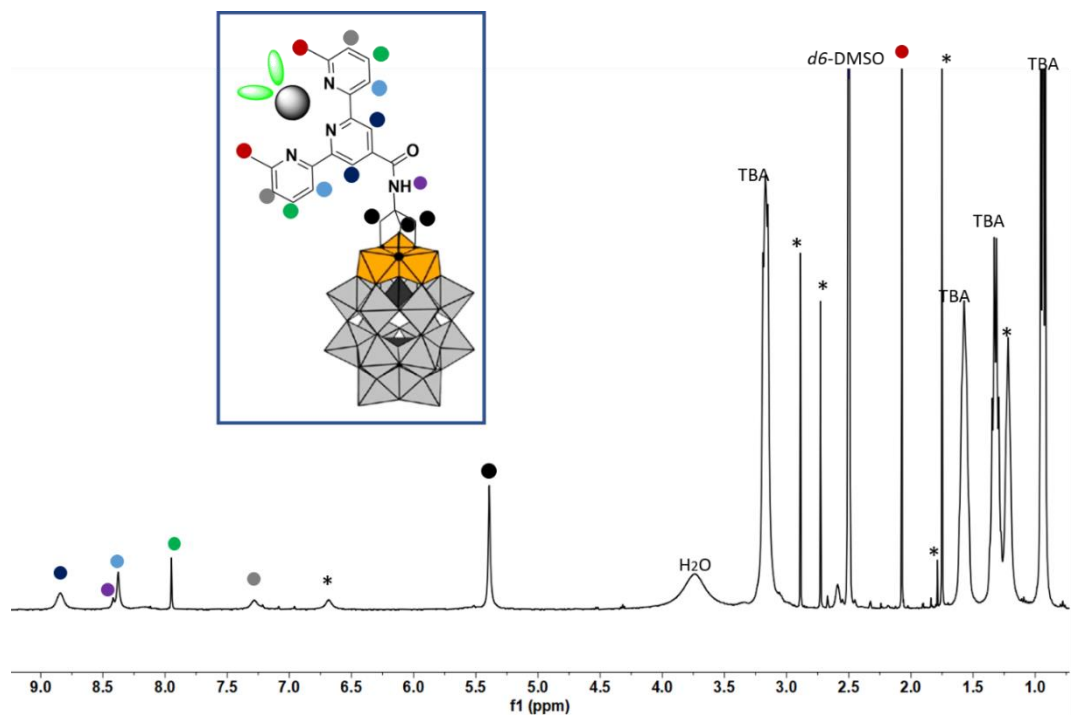

**Fig. S16.**  $^1\text{H}$  NMR spectrum of hybrid **H2<sup>cov</sup>** (POM + **K1**) in  $\text{DMSO-}d_6$  at 400 MHz.

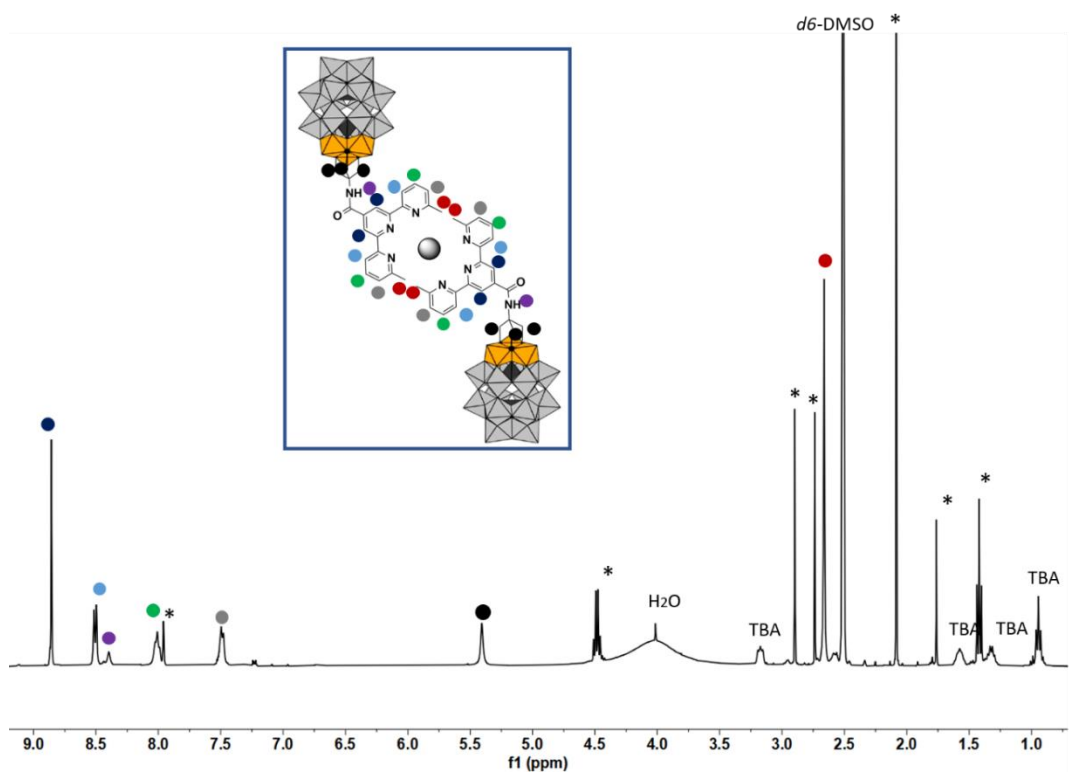

**Fig. S17.**  $^1\text{H}$  NMR spectrum of hybrid **H3<sup>cov</sup>** (POM + **K2**) in  $\text{DMSO-}d_6$  at 400 MHz.



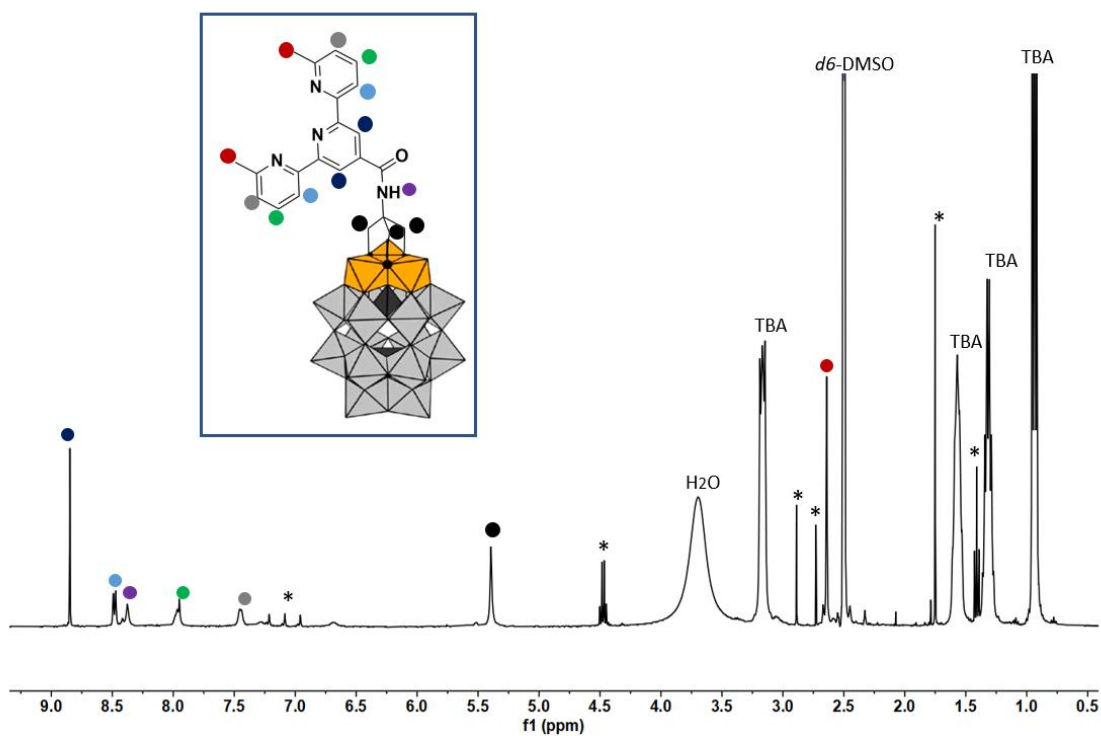

**Fig. S18.**  $^1\text{H}$  NMR spectrum of hybrid **H4<sup>cov</sup>** (**H1<sup>cov</sup>** +  $\text{ZnCl}_2$ ) in  $\text{DMSO-}d_6$  at 400 MHz.

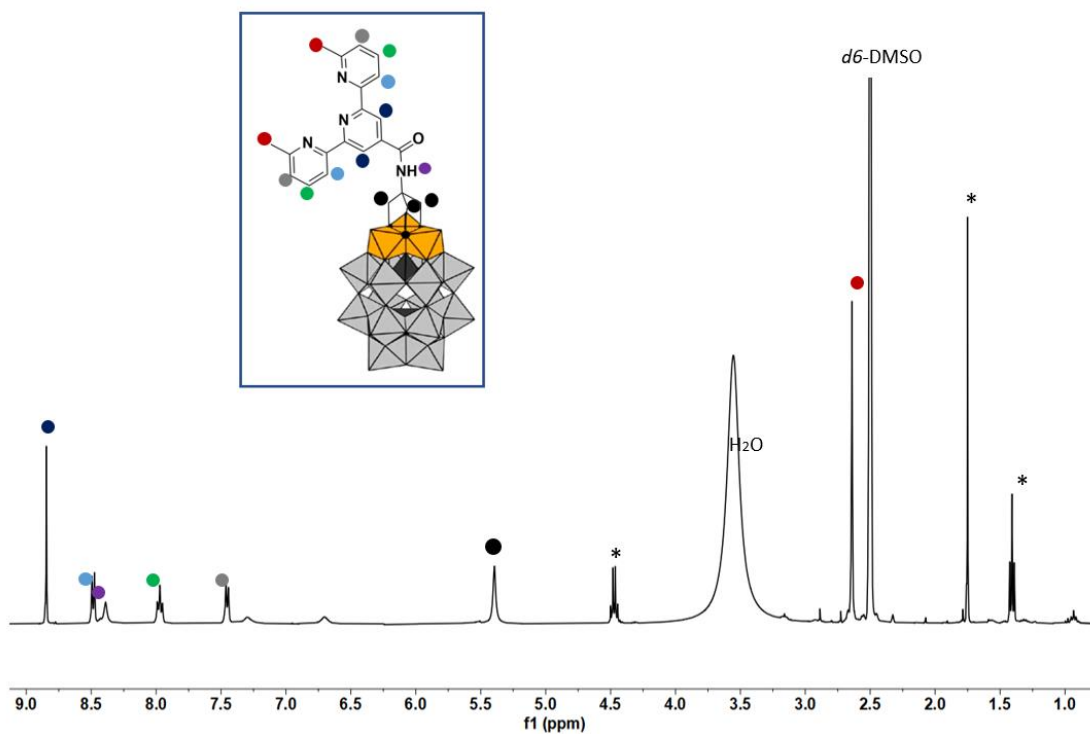

**Fig. S19.**  $^1\text{H}$  NMR spectrum of hybrid **H5<sup>cov</sup>** (**H1<sup>cov</sup>** +  $\text{Zn}(\text{ClO}_4)_2$ ) in  $\text{DMSO-}d_6$  at 400 MHz.

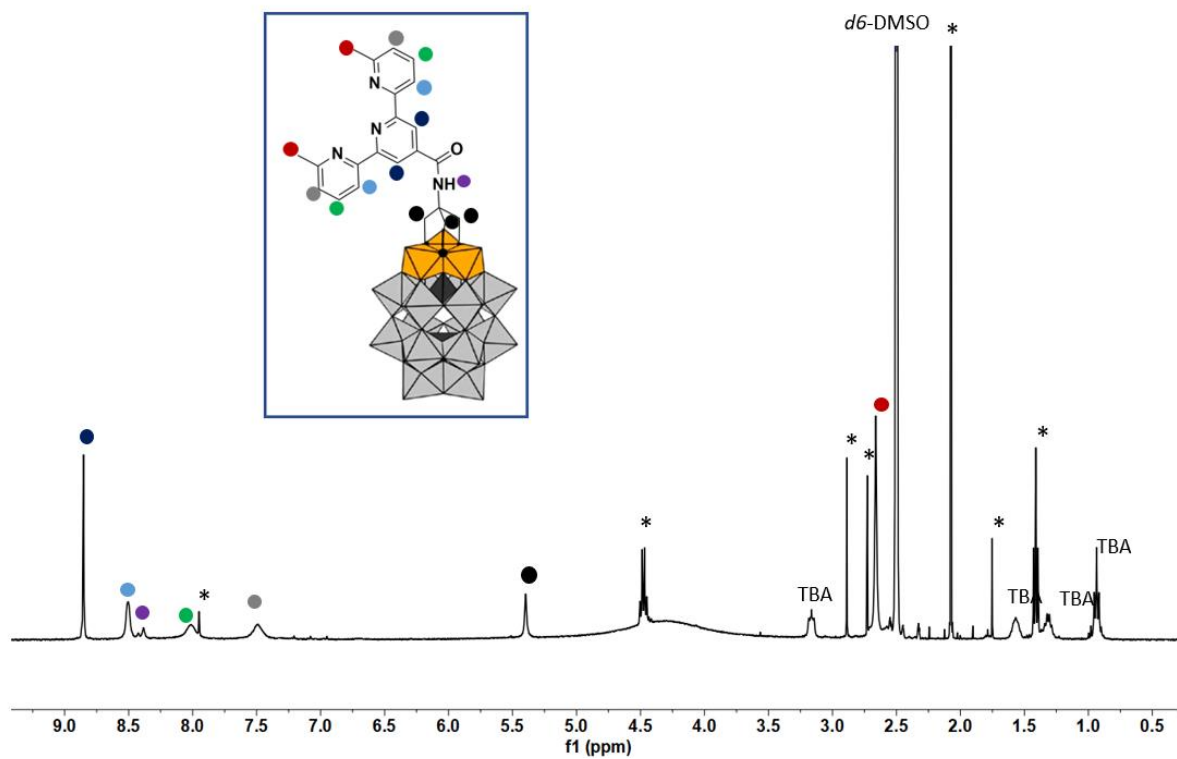

**Fig. S20.**  $^1\text{H}$  NMR spectrum of hybrid **H6<sup>cov</sup>** (POM + **L<sup>tpy</sup>** +  $\text{ZnCl}_2$ ) in  $\text{DMSO-}d_6$  at 400 MHz.

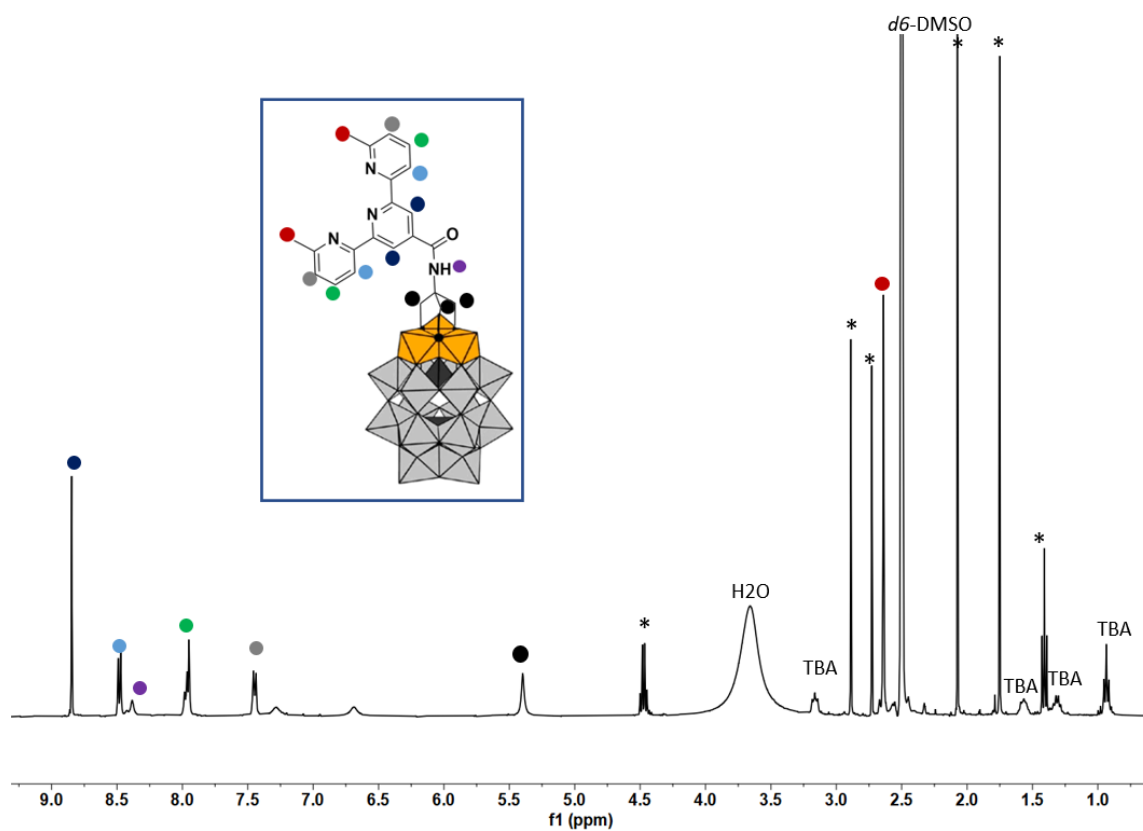

**Fig. S21.**  $^1\text{H}$  NMR spectrum of hybrid **H7<sup>cov</sup>** (POM + **L<sup>tpy</sup>** +  $\text{Zn}(\text{ClO}_4)_2$ ) in  $\text{DMSO-}d_6$  at 400 MHz.

## 5. Comparison of $^1\text{H}$ NMR spectra of compounds

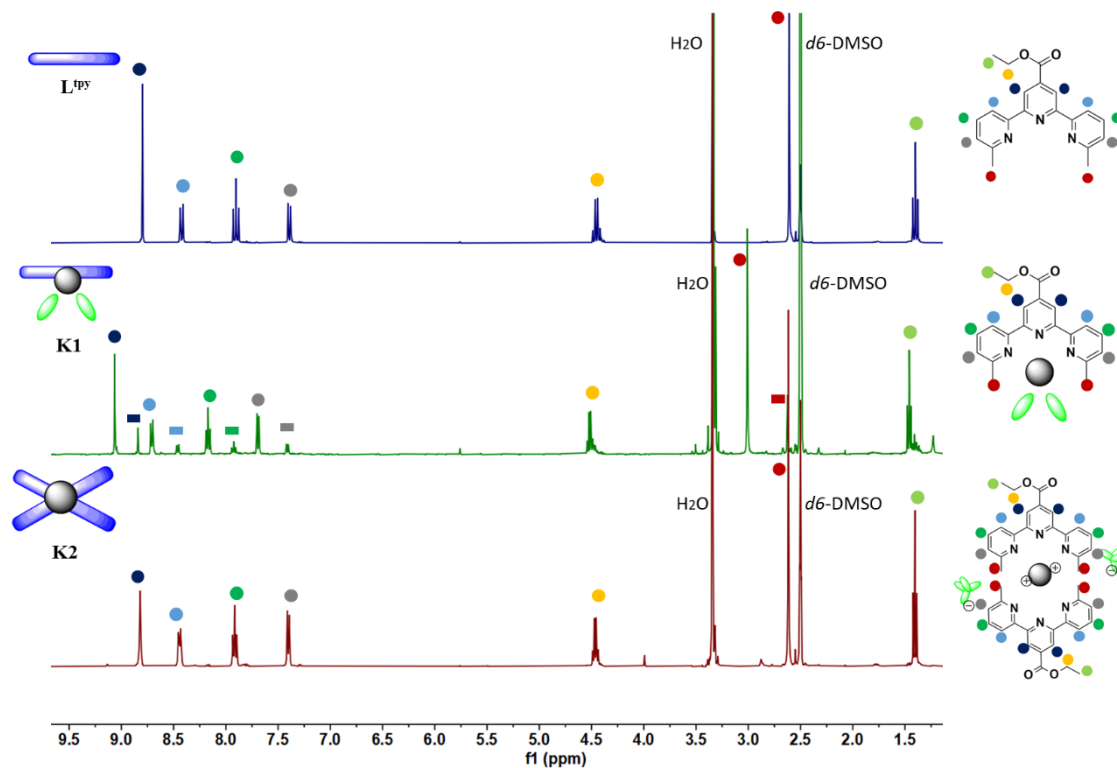

**Fig. S22.** Comparison of  $^1\text{H}$  NMR spectra of ligand  $\text{L}^{\text{tpy}}$  (blue), complex  $\text{K1}$  (green) and complex  $\text{K2}$  (red) in  $\text{DMSO-}d_6$  at 400 MHz.

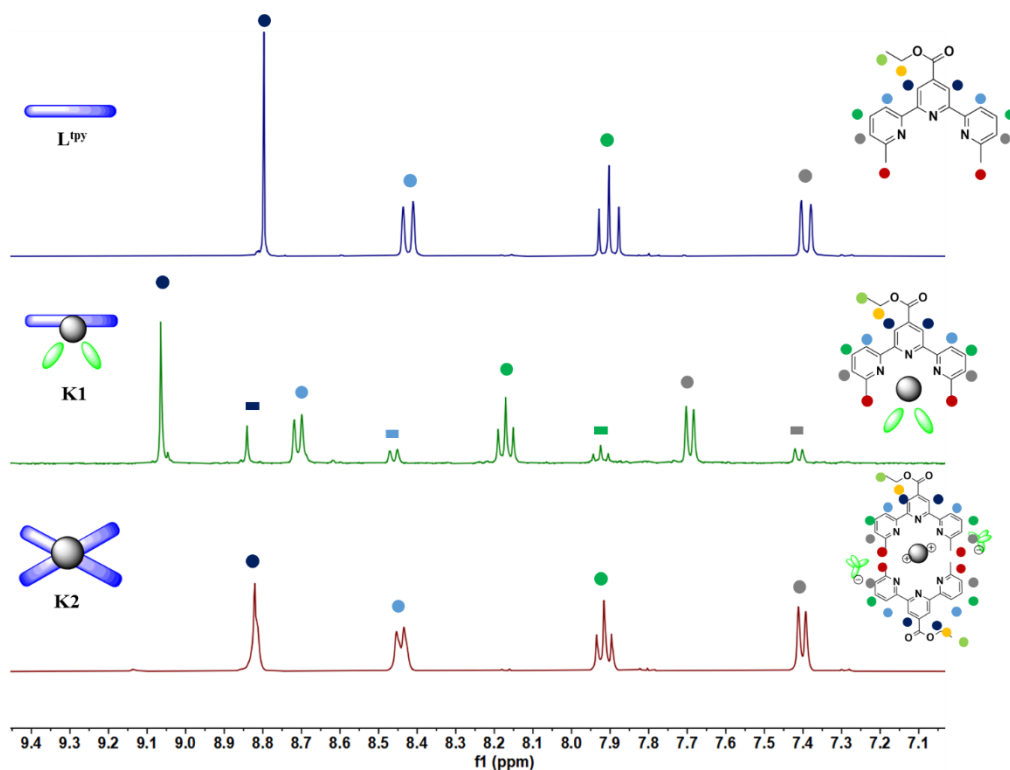

**Fig. S23.** Comparison of  $^1\text{H}$  NMR spectra of ligand  $\text{L}^{\text{tpy}}$  (blue), complex  $\text{K1}$  (green) and complex  $\text{K2}$  (red) in  $\text{DMSO-}d_6$  at 400 MHz (aromatic region).

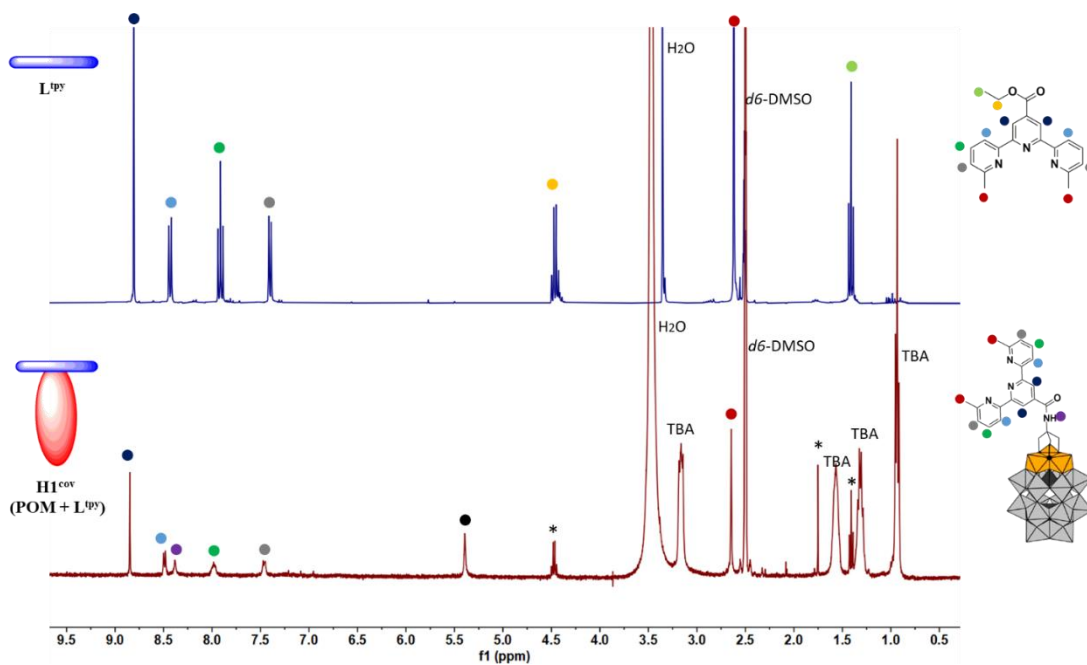

**Fig. S24.** Comparison of  $^1\text{H}$  NMR spectra of ligand  $\text{L}^{\text{tpy}}$  (blue) and hybrid  $\text{H1}^{\text{cov}}$  ( $\text{POM} + \text{L}^{\text{tpy}}$ ) (red) in  $\text{DMSO-}d_6$  at 400 MHz.

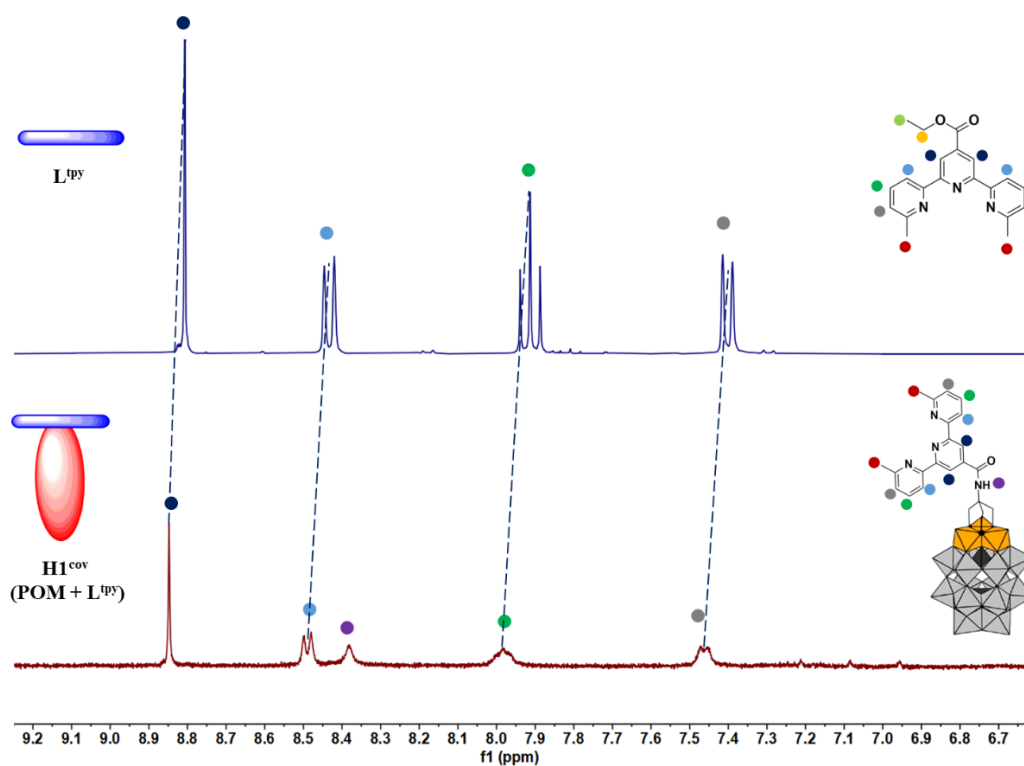

**Fig. S25.** Comparison of  $^1\text{H}$  NMR spectra of ligand  $\text{L}^{\text{tpy}}$  (blue) and hybrid  $\text{H1}^{\text{cov}}$  ( $\text{POM} + \text{L}^{\text{tpy}}$ ) (red) in  $\text{DMSO}-d_6$  at 400 MHz (aromatic region).

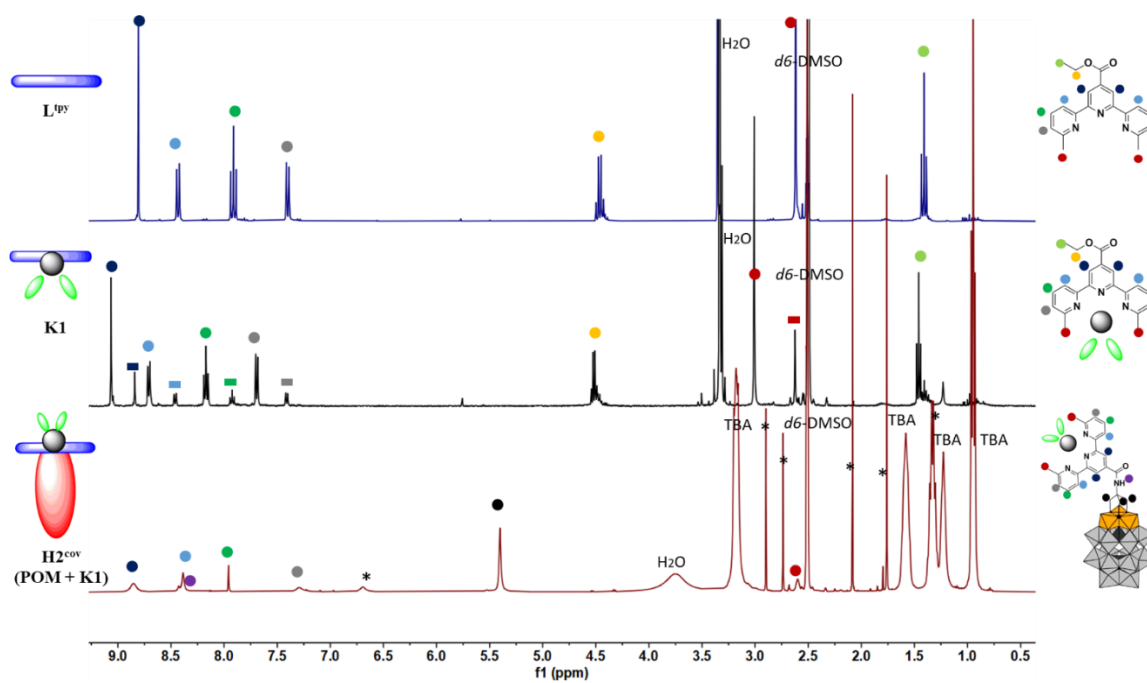

**Fig. S26.** Comparison of  $^1\text{H}$  NMR spectra of ligand  $\text{L}^{\text{tpy}}$  (blue), complex  $\text{K1}$  (black) and hybrid  $\text{H2}^{\text{cov}}$  ( $\text{POM} + \text{K1}$ ) (red) in  $\text{DMSO}-d_6$  at 400 MHz.

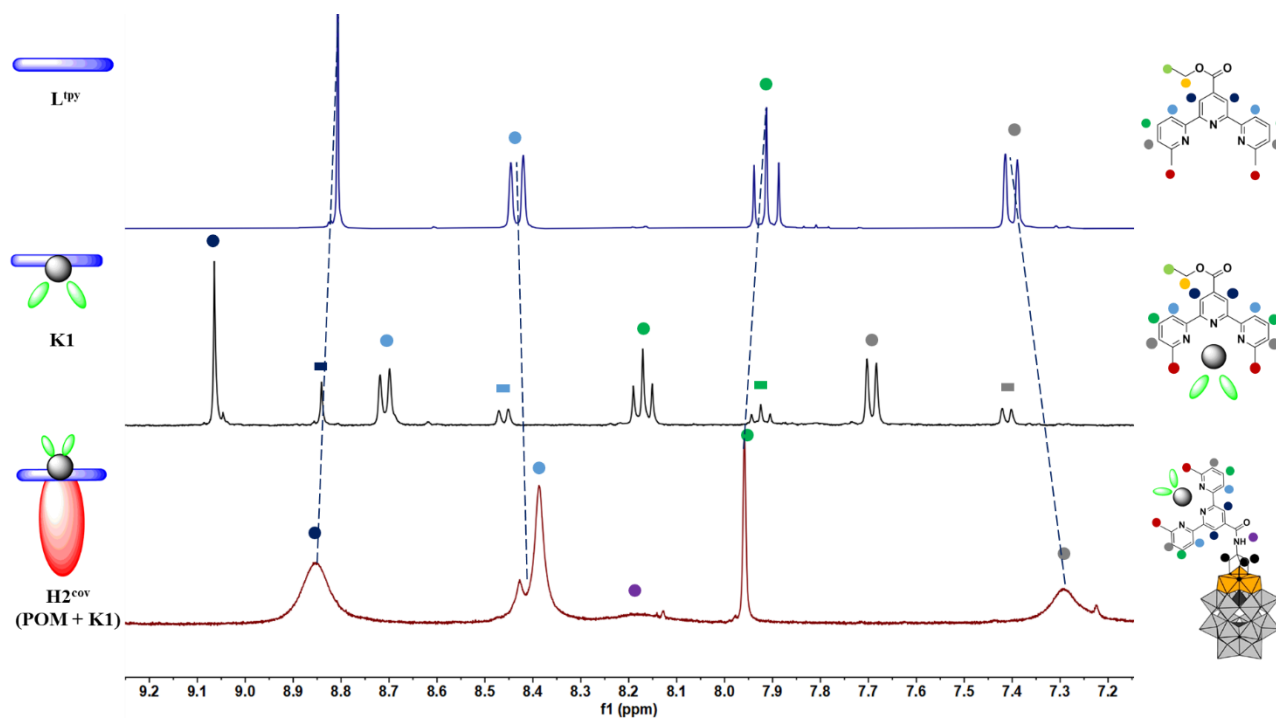

**Fig. S27.** Comparison of  $^1\text{H}$  NMR spectra of ligand  $\text{L}^{\text{tpy}}$  (blue), complex  $\text{K1}$  (black) and hybrid  $\text{H2}^{\text{cov}}$  ( $\text{POM} + \text{K1}$ ) (red) in  $\text{DMSO}-d_6$  at 400 MHz (aromatic region).

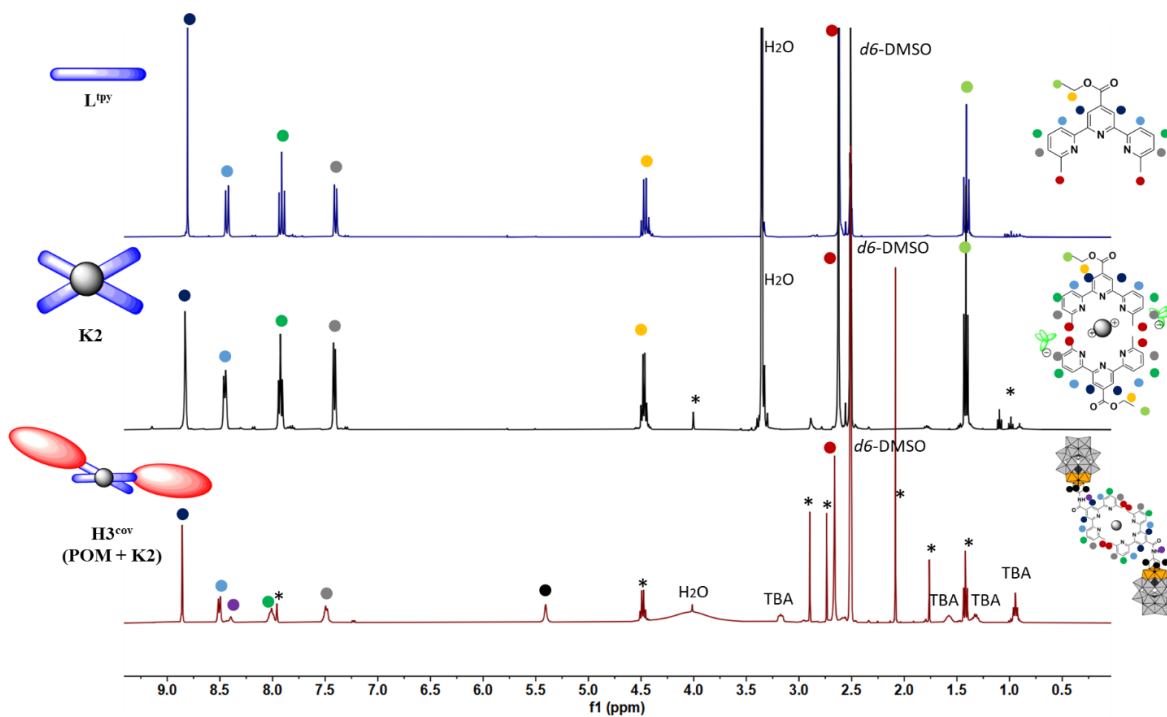

**Fig. S28.** Comparison of  $^1\text{H}$  NMR spectra of ligand  $\text{L}^{\text{tpy}}$  (blue), complex  $\text{K2}$  (black) and hybrid  $\text{H3}^{\text{cov}}$  ( $\text{POM} + \text{K2}$ ) (red) in  $\text{DMSO}-d_6$  at 400 MHz.

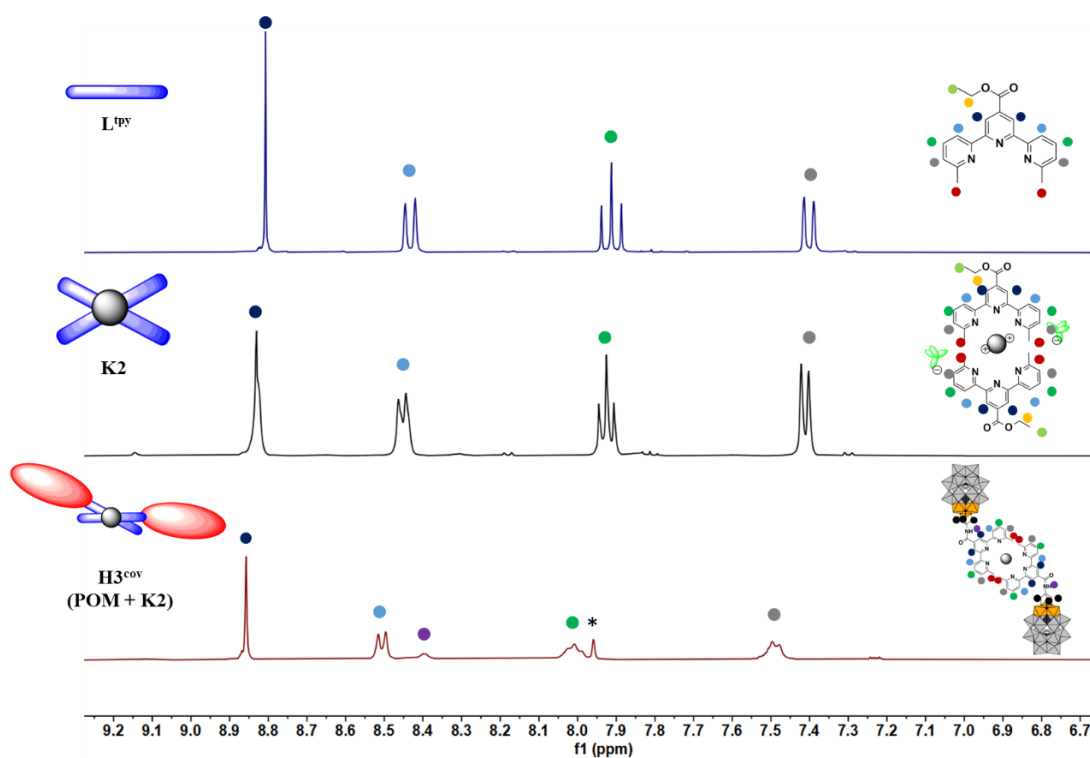

**Fig. S29.** Comparison of  $^1\text{H}$  NMR spectra of ligand  $\text{L}^{\text{tpy}}$  (blue), complex  $\text{K2}$  (black) and hybrid  $\text{H3}^{\text{cov}}$  ( $\text{POM} + \text{K2}$ ) (red) in  $\text{DMSO}-d_6$  at 400 MHz (aromatic region).

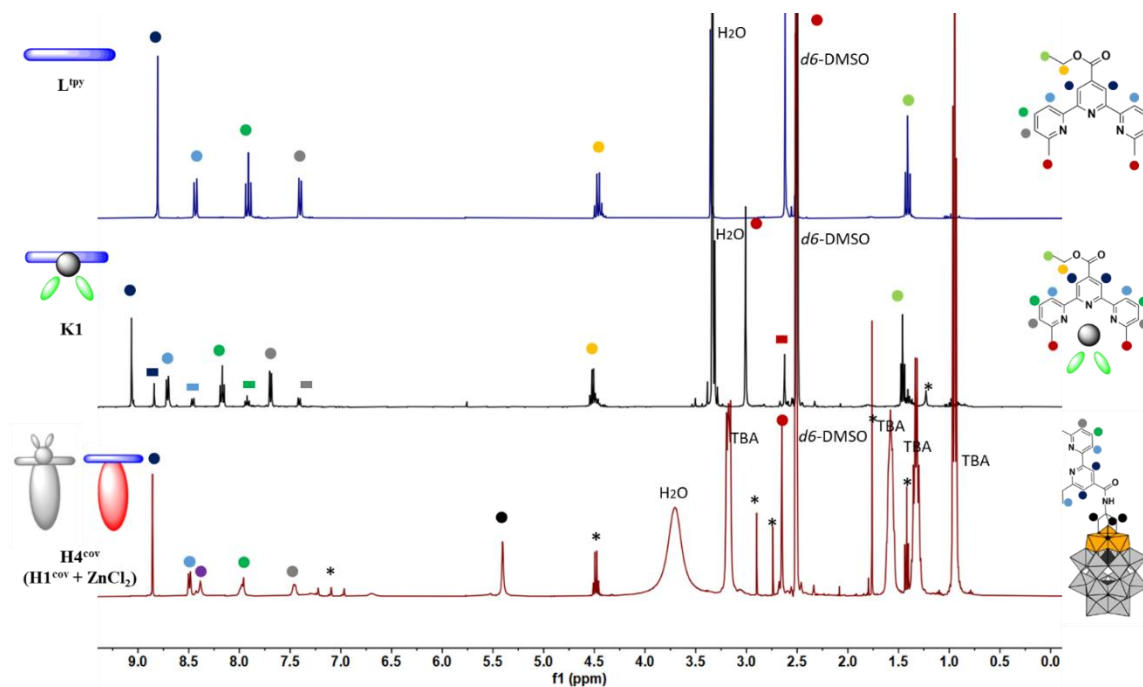

**Fig. S30.** Comparison of  $^1\text{H}$  NMR spectra of ligand  $\text{L}^{\text{tpy}}$  (blue), complex  $\text{K1}$  (black) and hybrid  $\text{H4}^{\text{cov}}$  ( $\text{H1}^{\text{cov}} + \text{ZnCl}_2$ ) (red) in  $\text{DMSO}-d_6$  at 400 MHz.

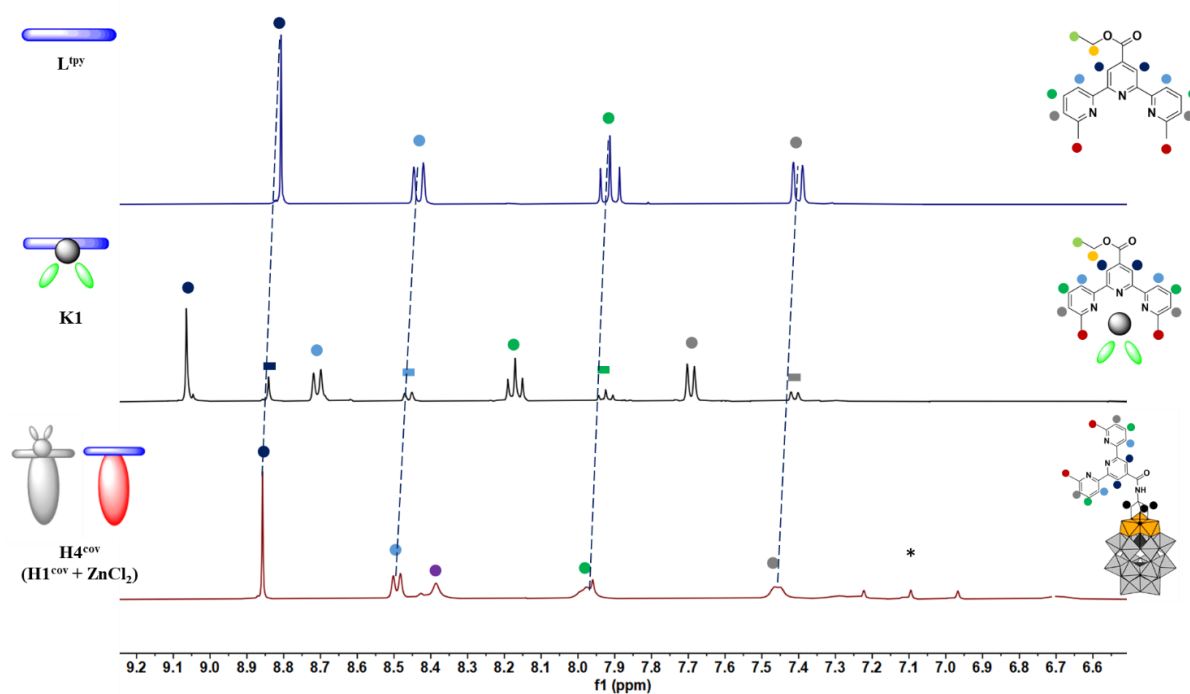

**Fig. S31.** Comparison of  $^1\text{H}$  NMR spectra of ligand  $\text{L}^{\text{tpy}}$  (blue), complex  $\text{K1}$  (black) and hybrid  $\text{H4}^{\text{cov}}$  ( $\text{H1}^{\text{cov}} + \text{ZnCl}_2$ ) (red) in  $\text{DMSO}-d_6$  at 400 MHz (aromatic region).

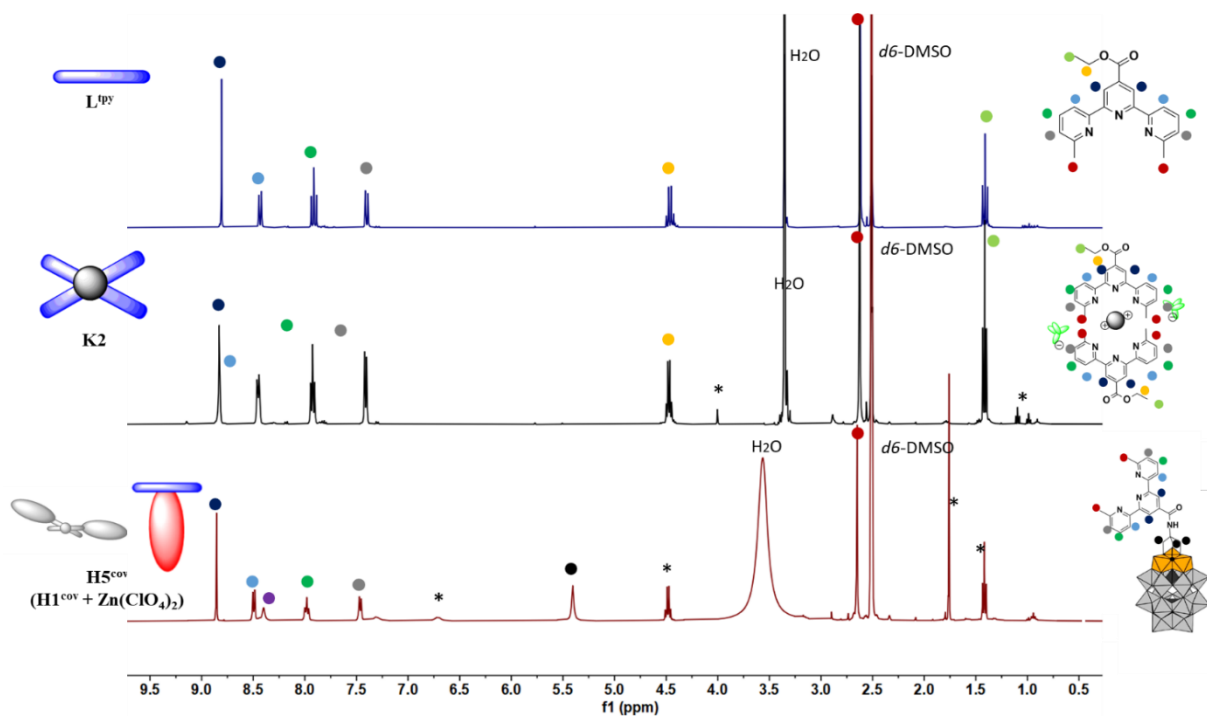

**Fig. S32.** Comparison of  $^1\text{H}$  NMR spectra of ligand  $\text{L}^{\text{tpy}}$  (blue), complex  $\text{K2}$  (black) and hybrid  $\text{H5}^{\text{cov}}$  ( $\text{H1}^{\text{cov}} + \text{Zn}(\text{ClO}_4)_2$ ) (red) in  $\text{DMSO}-d_6$  at 400 MHz.



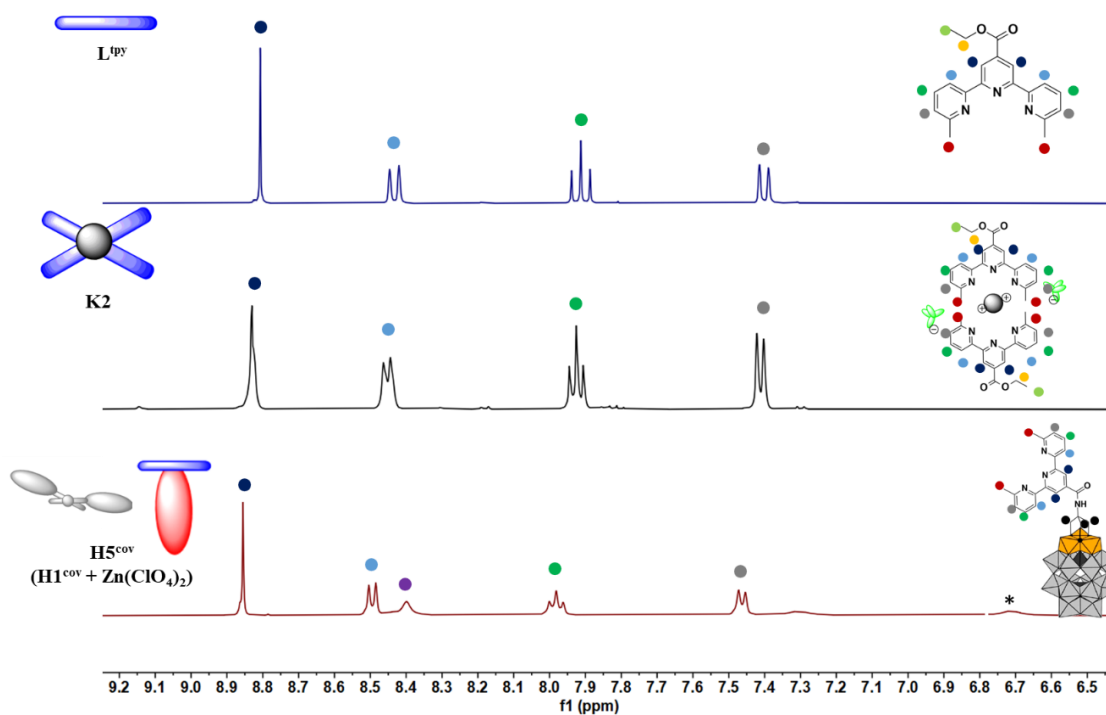

**Fig. S33.** Comparison of  $^1\text{H}$  NMR spectra of ligand  $\text{L}^{\text{tpy}}$  (blue), complex  $\text{K2}$  (black) and hybrid  $\text{H5}^{\text{cov}}$  ( $\text{H1}^{\text{cov}} + \text{Zn}(\text{ClO}_4)_2$ ) (red) in  $\text{DMSO}-d_6$  at 400 MHz (aromatic region).

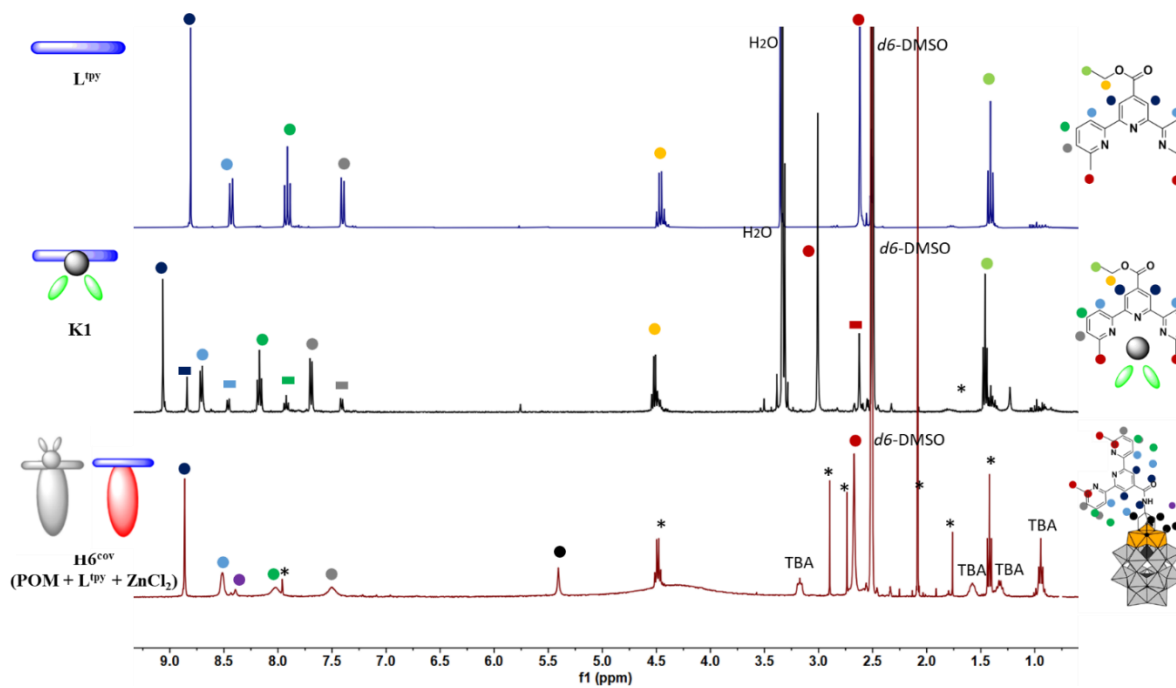

**Fig. S34.** Comparison of  $^1\text{H}$  NMR spectra of ligand  $\text{L}^{\text{tpy}}$  (blue), complex  $\text{K1}$  (black) and hybrid  $\text{H6}^{\text{cov}}$  ( $\text{POM} + \text{L}^{\text{tpy}} + \text{ZnCl}_2$ ) (red) in  $\text{DMSO}-d_6$  at 400 MHz.

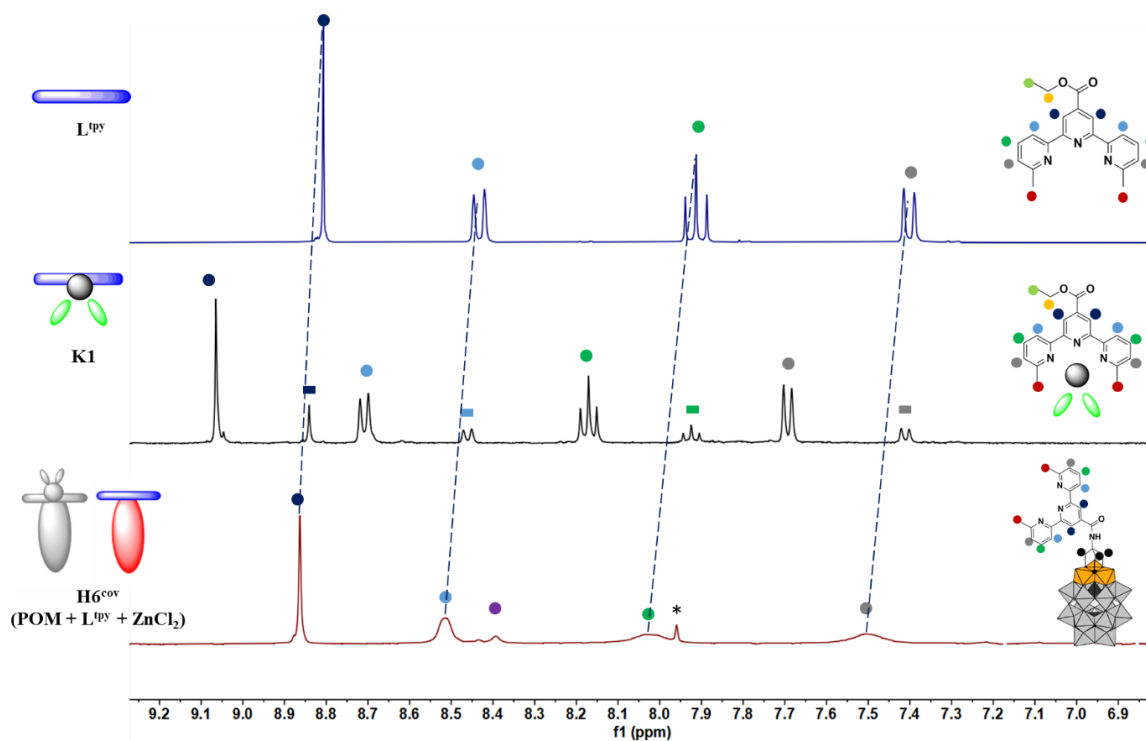

**Fig. S35.** Comparison of  $^1\text{H}$  NMR spectra of ligand  $\text{L}^{\text{tpy}}$  (blue), complex  $\text{K1}$  (black) and hybrid  $\text{H6}^{\text{cov}}$  ( $\text{POM} + \text{L}^{\text{tpy}} + \text{ZnCl}_2$ ) (red) in  $\text{DMSO}-d_6$  at 400 MHz (aromatic region).

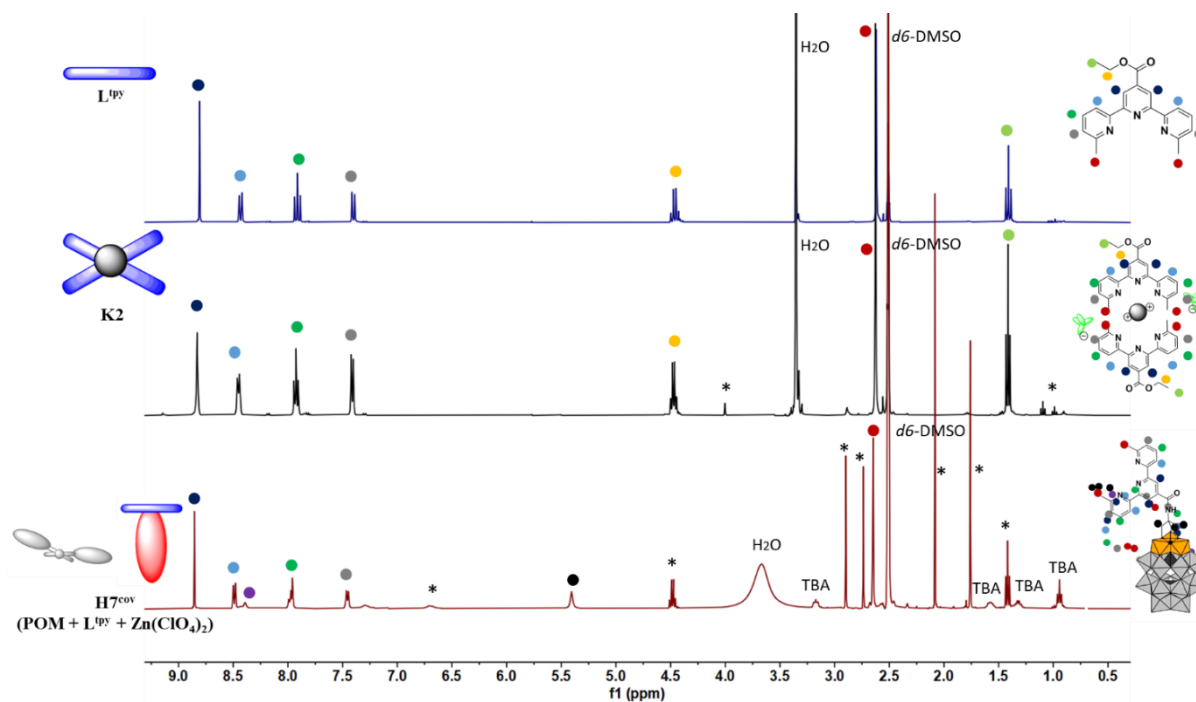

**Fig. S36.** Comparison of  $^1\text{H}$  NMR spectra of ligand  $\text{L}^{\text{tpy}}$  (blue), complex  $\text{K2}$  (black) and hybrid  $\text{H7}^{\text{cov}}$  ( $\text{POM} + \text{L}^{\text{tpy}} + \text{Zn}(\text{ClO}_4)_2$ ) (red) in  $\text{DMSO}-d_6$  at 400 MHz.

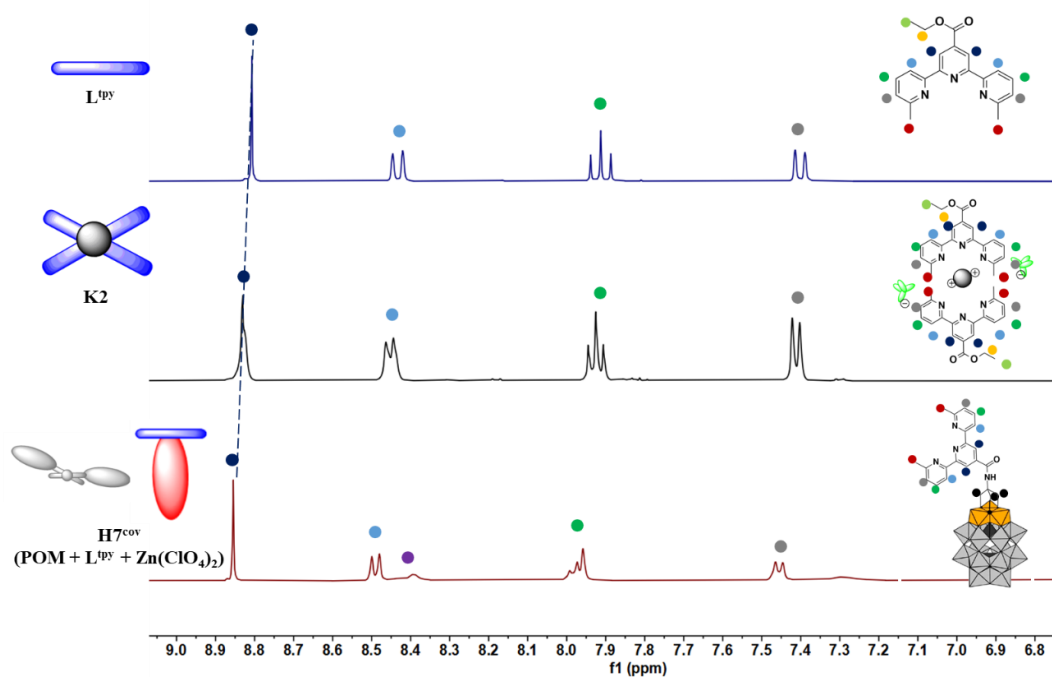

**Fig. S37.** Comparison of  $^1\text{H}$  NMR spectra of ligand  $\text{L}^{\text{tpy}}$  (blue), complex  $\text{K2}$  (black) and hybrid  $\text{H7}^{\text{cov}}$  ( $\text{POM} + \text{L}^{\text{tpy}} + \text{Zn}(\text{ClO}_4)_2$ ) (red) in  $\text{DMSO-}d_6$  at 400 MHz (aromatic region).

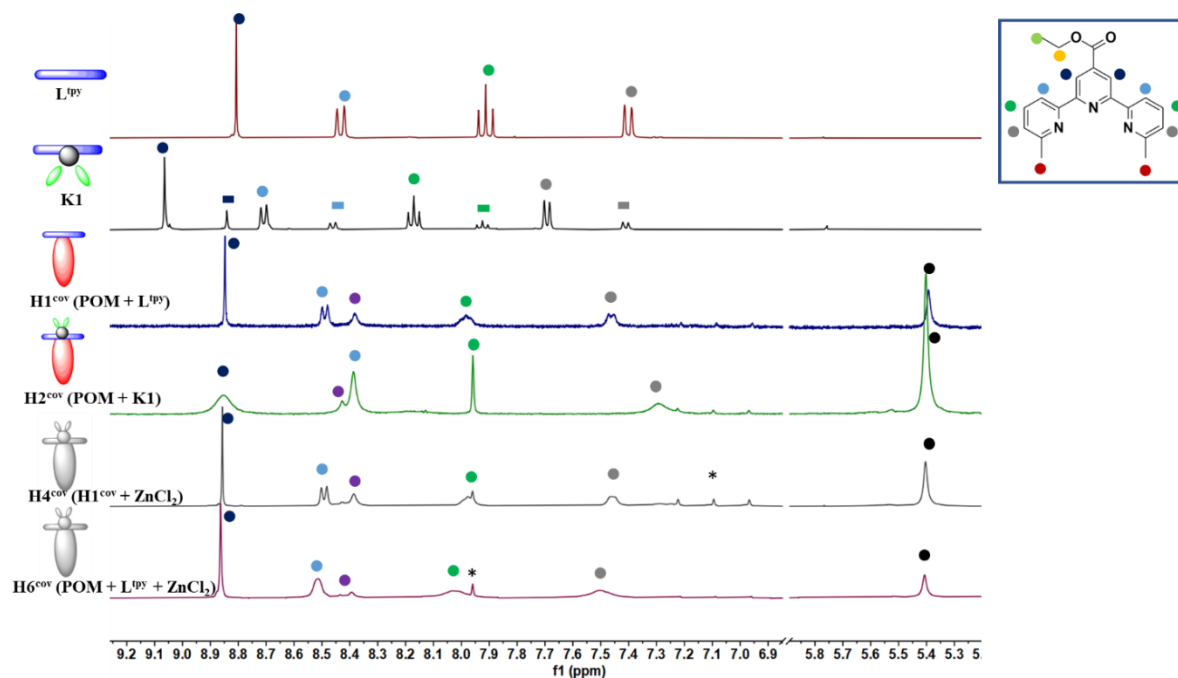

**Fig. S38.** Comparison of  $^1\text{H}$  NMR spectra of ligand  $\text{L}^{\text{tpy}}$ , complex  $\text{K1}$  and hybrids:  $\text{H1}^{\text{cov}}$  ( $\text{POM} + \text{L}^{\text{tpy}}$ ),  $\text{H2}^{\text{cov}}$  ( $\text{POM} + \text{K1}$ ),  $\text{H4}^{\text{cov}}$  ( $\text{H1}^{\text{cov}} + \text{ZnCl}_2$ ),  $\text{H6}^{\text{cov}}$  ( $\text{POM} + \text{L}^{\text{tpy}} + \text{ZnCl}_2$ ), respectively in  $\text{DMSO-}d_6$  at 400 MHz.

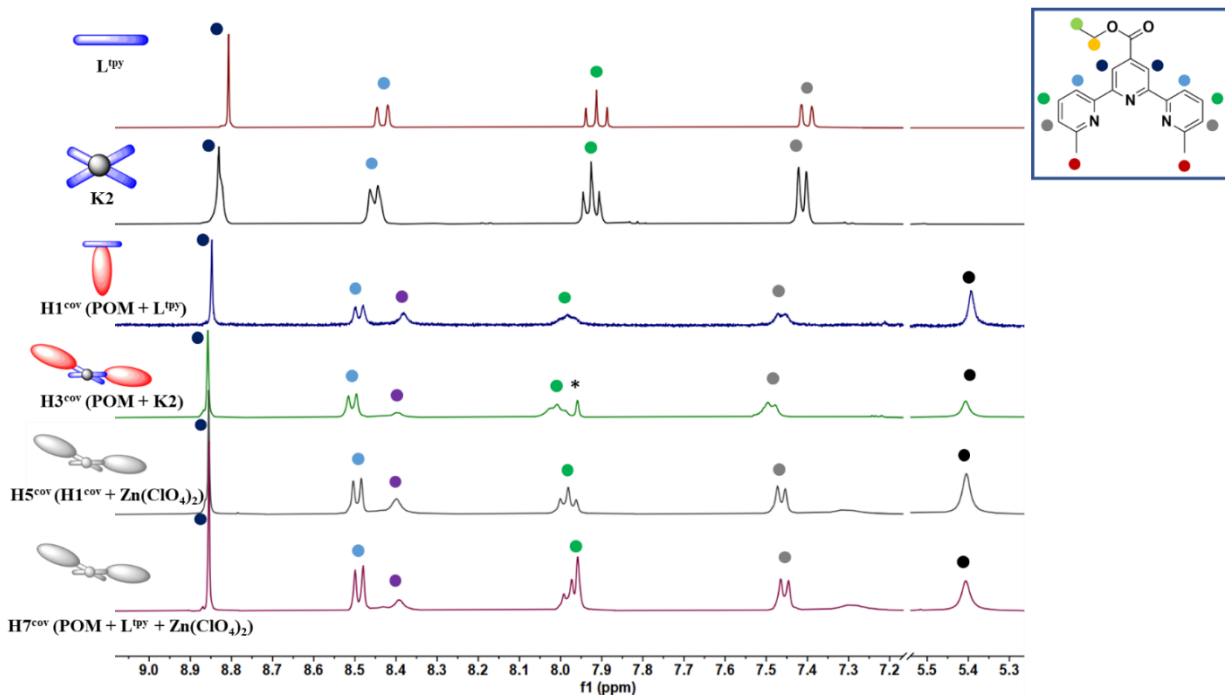

**Fig. S39.** Comparison of  $^1\text{H}$  NMR spectra of ligand  $\text{L}^{\text{tpy}}$ , complex  $\text{K1}$  and hybrids:  $\text{H1}^{\text{cov}}$  ( $\text{POM} + \text{L}^{\text{tpy}}$ ),  $\text{H3}^{\text{cov}}$  ( $\text{POM} + \text{K2}$ ),  $\text{H5}^{\text{cov}}$  ( $\text{H1}^{\text{cov}} + \text{Zn}(\text{ClO}_4)_2$ ),  $\text{H7}^{\text{cov}}$  ( $\text{POM} + \text{L}^{\text{tpy}} + \text{Zn}(\text{ClO}_4)_2$ ), respectively in  $\text{DMSO-}d_6$  at 400 MHz.

## 6. $^{31}\text{P}$ NMR spectra of hybrids

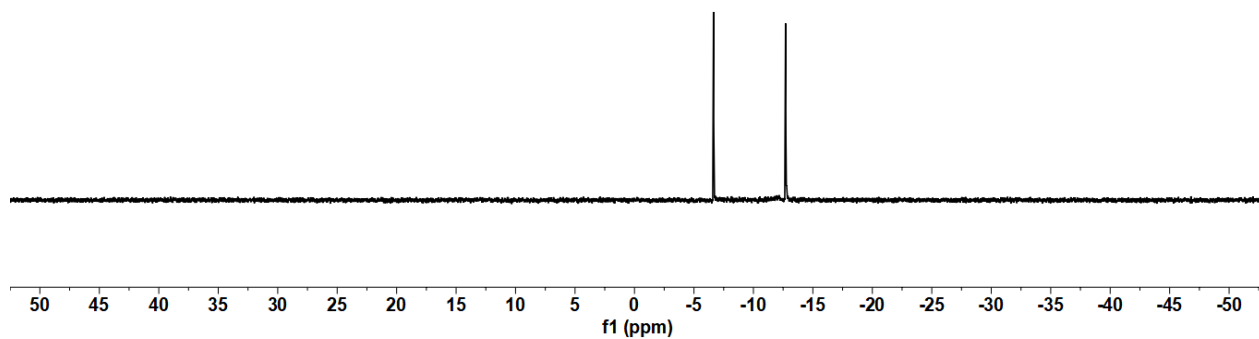

**Fig. S40.**  $^{31}\text{P}$  NMR spectrum of hybrid  $\text{H1}^{\text{cov}}$  ( $\text{POM} + \text{L}^{\text{tpy}}$ ) in  $\text{DMSO-}d_6$  at 400 MHz.

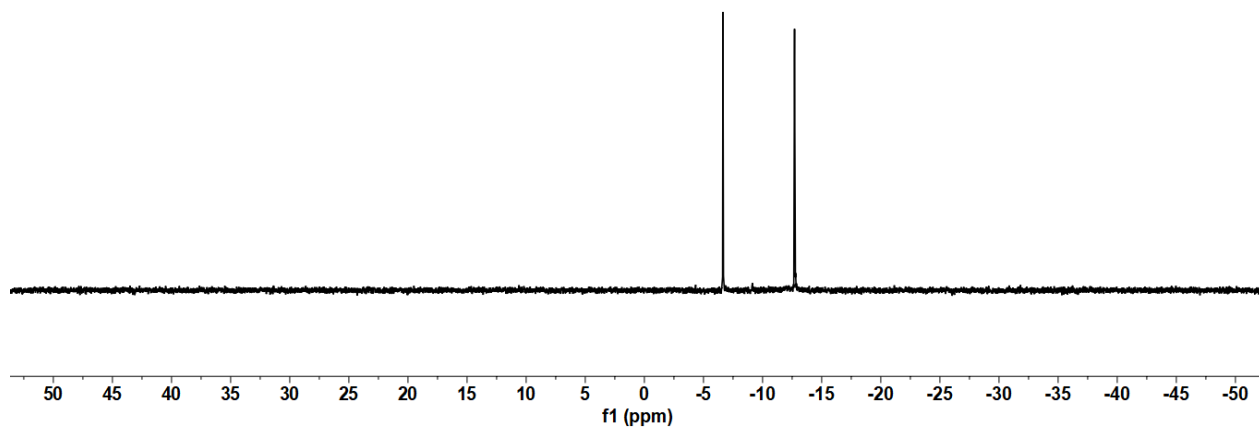

**Fig. S41.**  $^{31}\text{P}$  NMR spectrum of hybrid **H2<sup>cov</sup>** (**POM** + **K1**) in  $\text{DMSO-}d_6$  at 400 MHz.

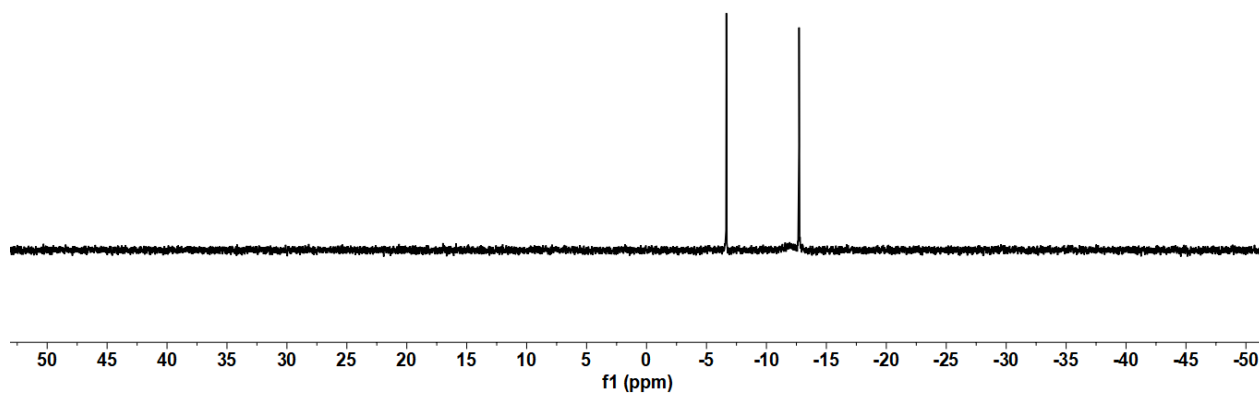

**Fig. S42.**  $^{31}\text{P}$  NMR spectrum of hybrid **H3<sup>cov</sup>** (**POM** + **K2**) in  $\text{DMSO-}d_6$  at 400 MHz.

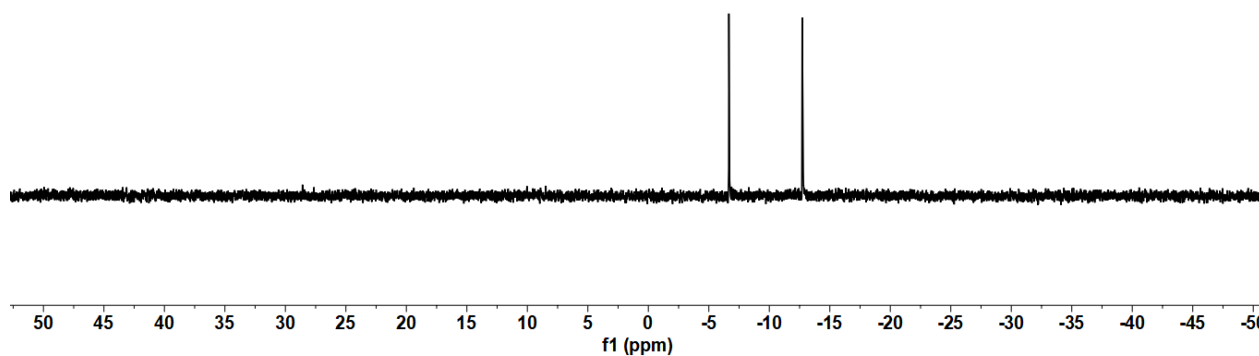

**Fig. S43.**  $^{31}\text{P}$  NMR spectrum of hybrid **H4<sup>cov</sup>** (**H1<sup>cov</sup>** + **ZnCl<sub>2</sub>**) in  $\text{DMSO-}d_6$  at 400 MHz.

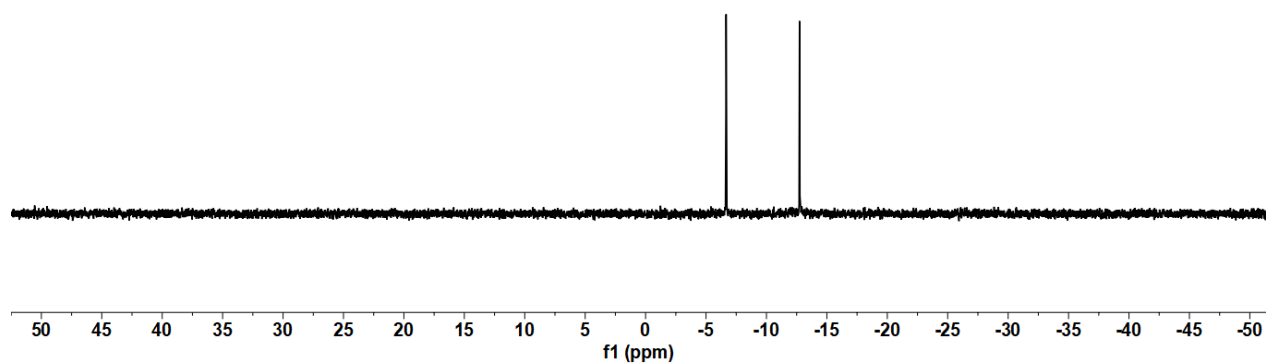

**Fig. S44.**  $^{31}\text{P}$  NMR spectrum of hybrid **H5<sup>cov</sup>** (**H1<sup>cov</sup>** + **Zn(ClO<sub>4</sub>)<sub>2</sub>**) in DMSO-*d*<sub>6</sub> at 400 MHz.

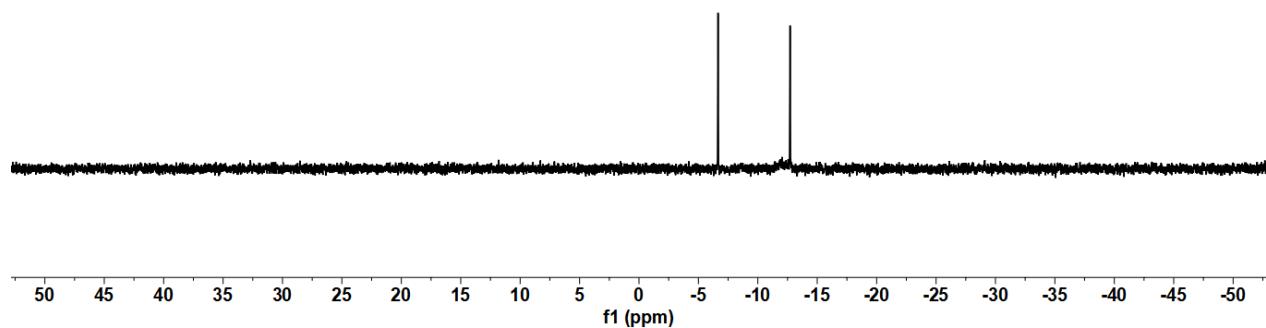

**Fig. S45.**  $^{31}\text{P}$  NMR spectrum of hybrid **H6<sup>cov</sup>** (**POM** + **L<sup>tpy</sup>** + **ZnCl<sub>2</sub>**) in DMSO-*d*<sub>6</sub> at 400 MHz.

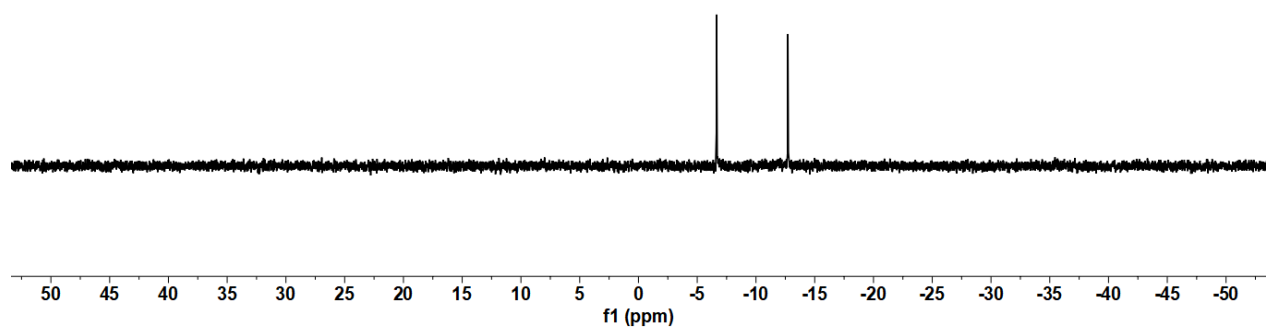

**Fig. S46.**  $^{31}\text{P}$  NMR spectrum of hybrid **H7<sup>cov</sup>** (**POM** + **L<sup>tpy</sup>** + **Zn(ClO<sub>4</sub>)<sub>2</sub>**) in DMSO-*d*<sub>6</sub> at 400 MHz.

## 7. Comparison of $^{31}\text{P}$ NMR spectra of hybrids

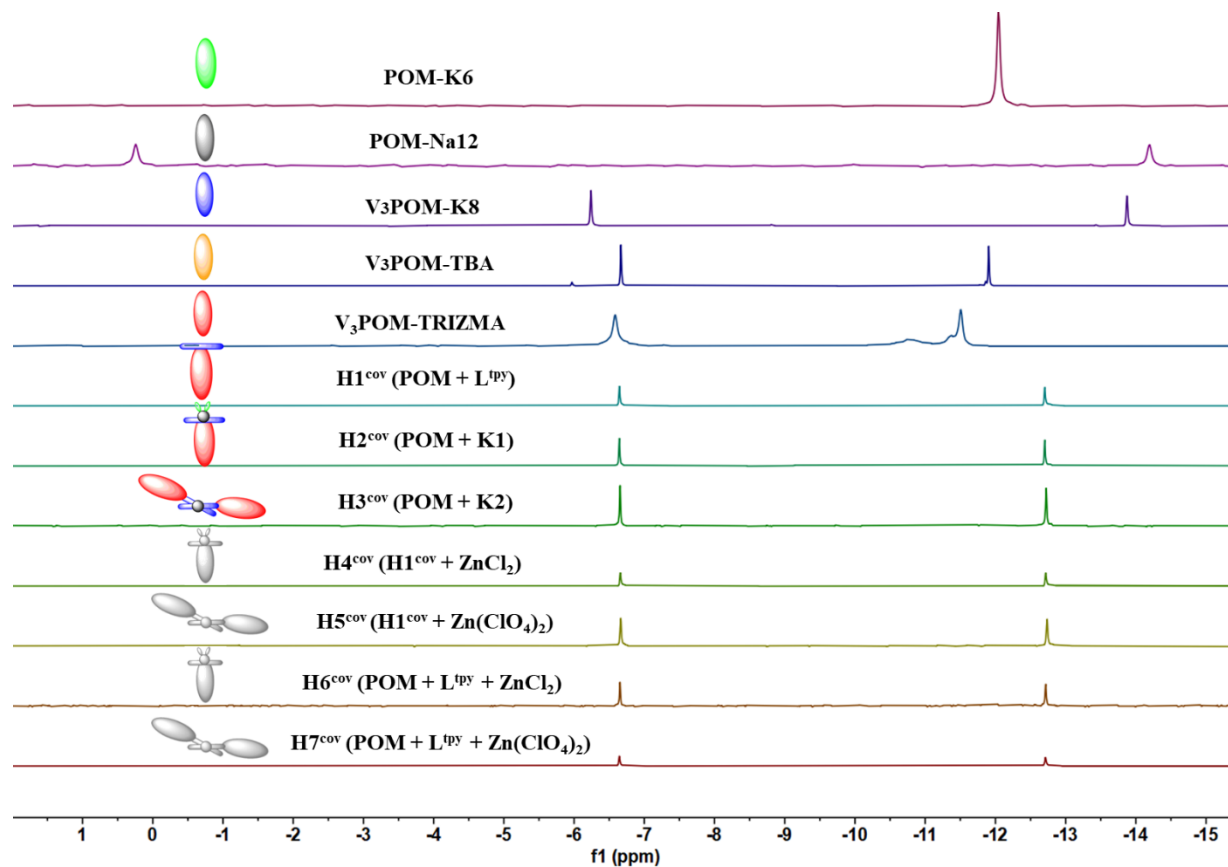

**Fig. S47.** Comparison of  $^{31}\text{P}$  NMR spectra of hybrids: **POM-K6**, **POM-Na12**, **V3POM-K8**, **V3POM-TBA**, **V3POM-TRIZMA**, **H1<sup>cov</sup> (POM + L<sup>tpy</sup>)**, **H2<sup>cov</sup> (POM + K1)**, **H3<sup>cov</sup> (POM + K2)**, **H4<sup>cov</sup> (H1<sup>cov</sup> + ZnCl<sub>2</sub>)**, **H5<sup>cov</sup> (H1<sup>cov</sup> + Zn(ClO<sub>4</sub>)<sub>2</sub>)**, **H6<sup>cov</sup> (POM + L<sup>tpy</sup> + ZnCl<sub>2</sub>)**, **H7<sup>cov</sup> (POM + L<sup>tpy</sup> + Zn(ClO<sub>4</sub>)<sub>2</sub>)**, respectively in DMSO-*d*<sub>6</sub> at 400 MHz.

## 8. Biological measurements

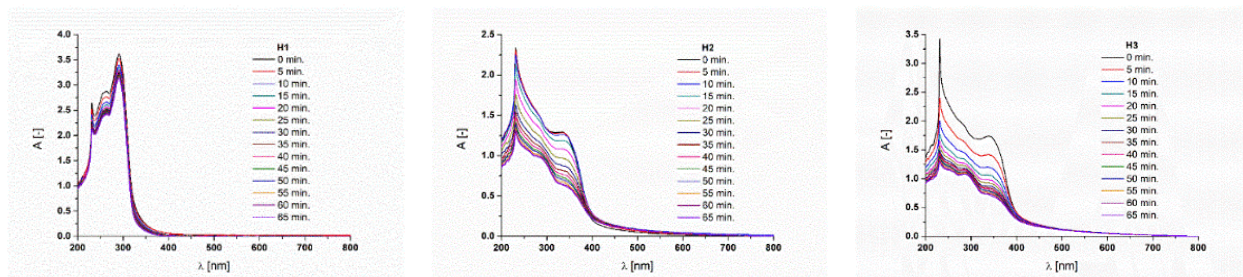

**Fig. S48.** Time-dependent equilibration of **H1<sup>ion</sup>** and **H2<sup>ion</sup>** and **H3<sup>ion</sup>** in Tris Buffer with 1% DMSO content.

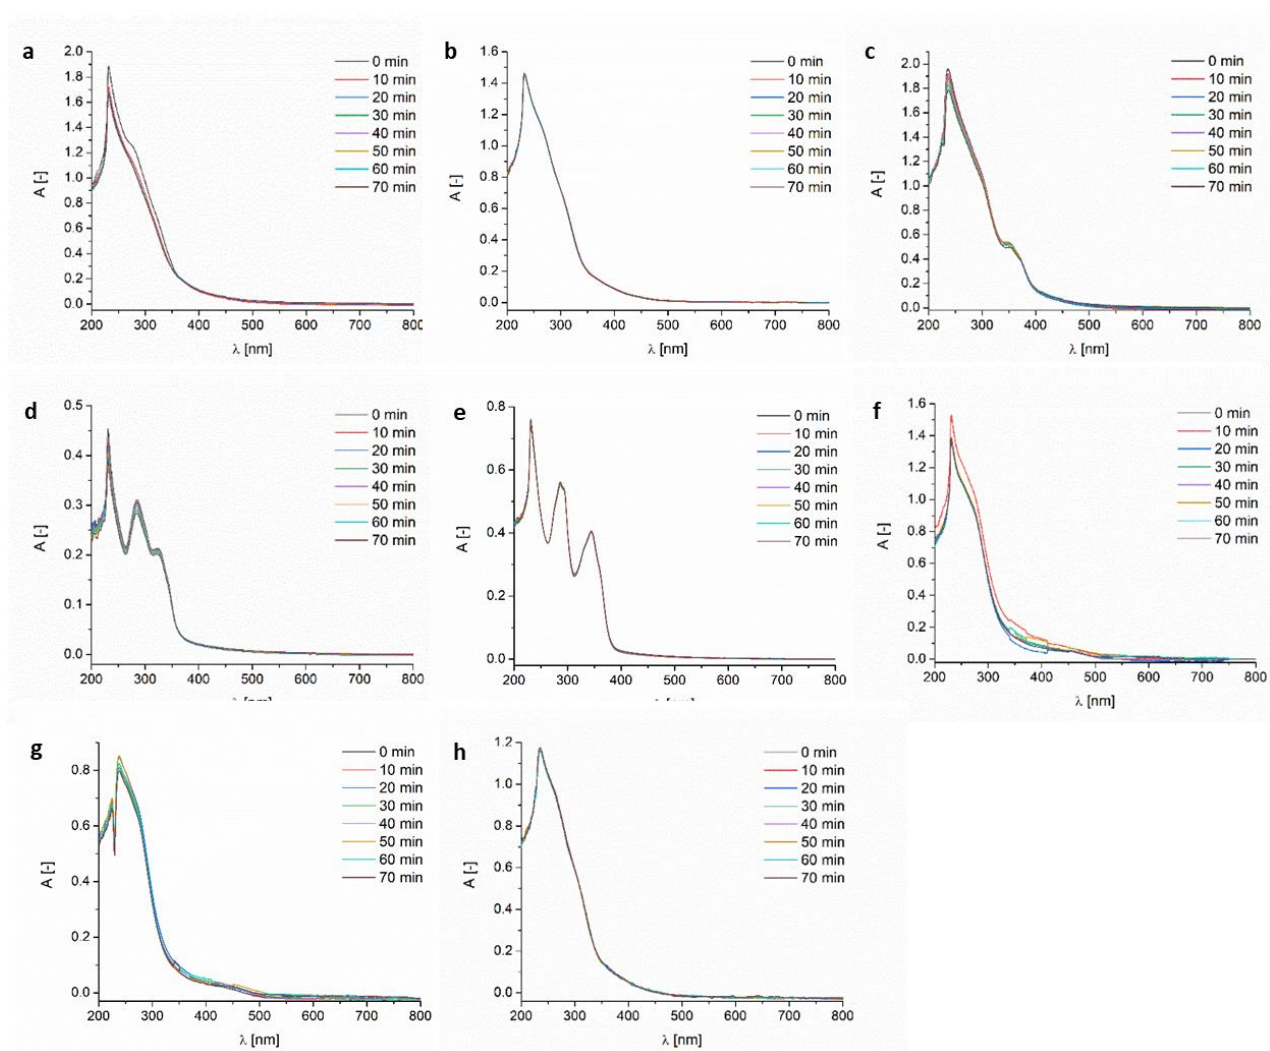

**Fig. S49.** Time-dependent equilibration of (a) **H1<sup>cov</sup>**, (b) **H2<sup>cov</sup>**, (c) **H3<sup>cov</sup>**, (d) **L**, (e) **K2**, (f) **V3P-K8**, (g) **V3P-TBA** and (h) **V3P+trizma** in Tris Buffer (5 mM Tris, 50 mM NaCl, pH = 7.4) with 1% DMSO content.



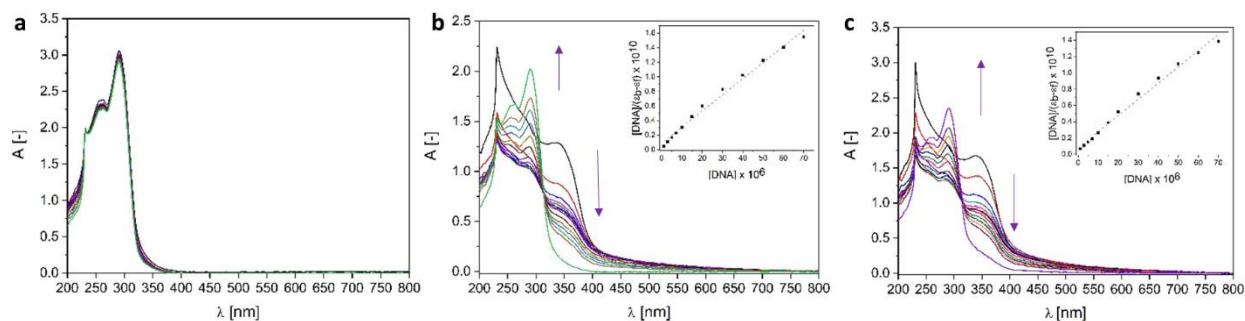

**Fig. S50.** Titration of (a)  $\text{H1}^{\text{ion}}$  and (b/c)  $\text{H2}^{\text{ion}}$  /  $\text{H3}^{\text{ion}}$  CD-SECs with aliquots of CT-DNA in (5 mM Tris, 50 mM NaCl, pH = 7.4) with 1% DMSO content. Arrows show changes upon increasing CT-DNA concentration. Insets in **b** and **c**: plot of  $[\text{DNA}]/(\epsilon_a - \epsilon_f)$  versus  $[\text{DNA}]$ ; ■, experimental data points; solid line, linear fitting of the data.

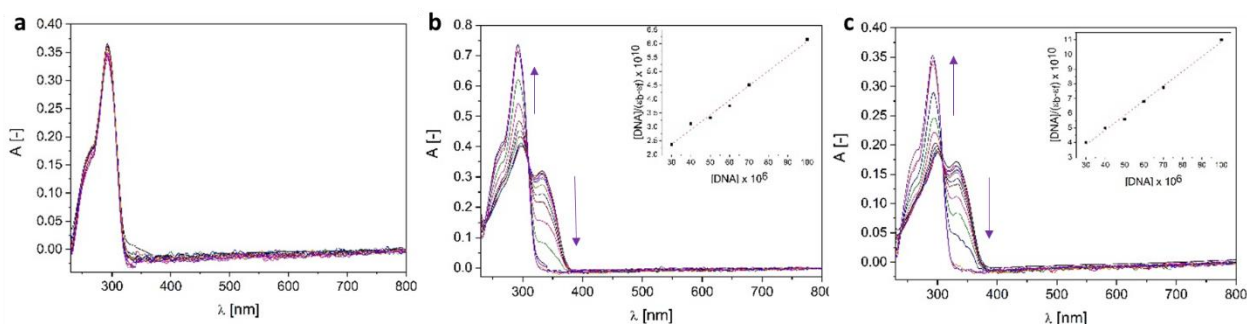

**Fig. S51.** Titration of (a)  $\text{L}^{\text{N2O}}$ , (b)  $\text{K1}^{\text{ion}}$  and (c)  $\text{K2}^{\text{ion}}$  with aliquots of CT-DNA in (5 mM Tris, 50 mM NaCl, pH = 7.4) with 1% DMSO content. Arrows show changes upon increasing CT-DNA concentration. Insets in **b** and **c**: plot of  $[\text{DNA}]/(\epsilon_a - \epsilon_f)$  versus  $[\text{DNA}]$ ; ■, experimental data points; solid line, linear fitting of the data.

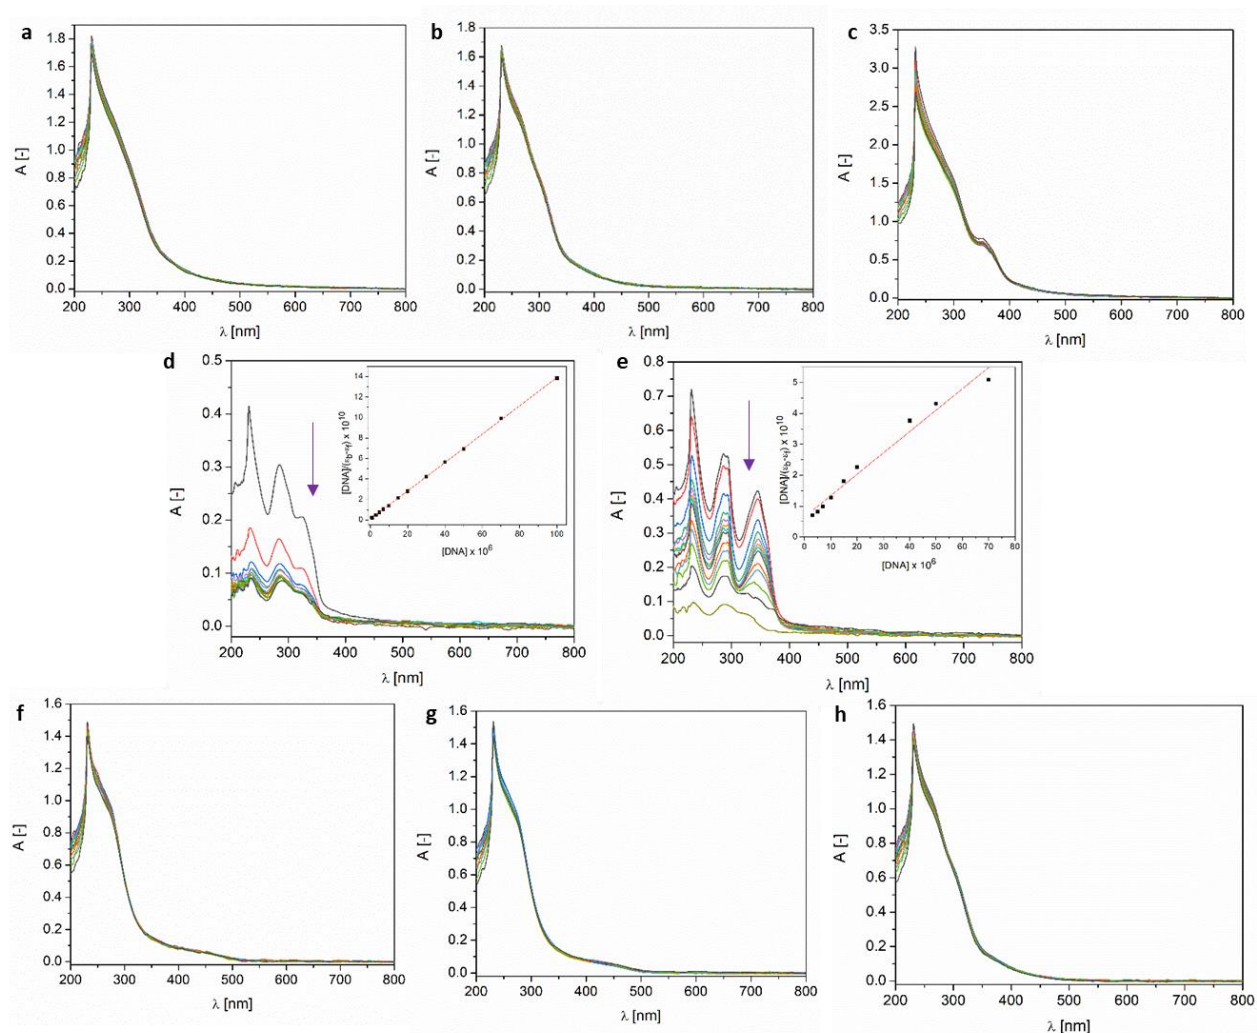

**Fig. S52.** Titration of (a) **H1<sup>cov</sup>**, (b) **H2<sup>cov</sup>**, (c) **H3<sup>cov</sup>**, (d) **L<sup>tpy</sup>**, (e) **K2**, (f) **V3P-K8**, (g) **V3P-TBA** and (h) **V3P+trizma** with aliquots of CT-DNA in (5 mM Tris, 50 mM NaCl, pH = 7.4) with 1% DMSO content. Arrows show hypochromic changes upon increasing CT-DNA concentration. Insets in **d** and **e**: plot of  $[DNA]/(\epsilon_a - \epsilon_f)$  versus  $[DNA]$ ; ■, experimental data points; solid line, linear fitting of the data.

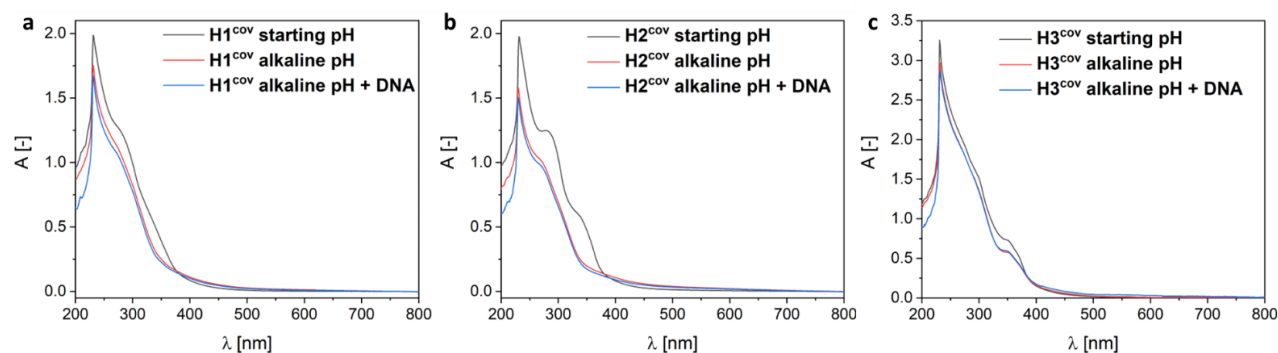

**Fig. S53.** Investigation on the influence of pH change (to ~8.6) on the stability of (a) **H1<sup>cov</sup>**, (b) **H2<sup>cov</sup>** and (c) **H3<sup>cov</sup>** with subsequent addition of the 100  $\mu$ M CT-DNA aliquots in miliQ water with 1% DMSO content after 1 h equilibration period.

## References

1. G. Ulrich, S. Bedel, C. Picard and P. Tisnès, *Tetrahedron Letters*, 2001, **42**, 6113-6115.
